# Supplementary material for: Play-based interventions to support social and communication development in autistic children aged 2–8 years: A scoping review
Source: PubMed Central journal article supplement — Autism Dev Lang Impair. 2021 Jun 8;6:23969415211015840. doi: 10.1177/23969415211015840 (PMC9620698; doi:10.1177/23969415211015840), 2021-06-08
Supplement: sj-pdf-1-dli-10.1177_23969415211015840.pdf [file sj-pdf-1-dli-10.1177_23969415211015840.pdf]

Data charting form

| <u>Bibliographic / Study Details</u>                                                                            |  |
|-----------------------------------------------------------------------------------------------------------------|--|
| <u>Study title</u>                                                                                              |  |
| <u>Study citation details (e.g. author/s, date, title, journal, volume, issue, pages)</u>                       |  |
| <u>Search source (database)</u>                                                                                 |  |
| <u>Study design</u>                                                                                             |  |
| <u>Participants</u>                                                                                             |  |
| <u>Co-occurring conditions</u>                                                                                  |  |
| <u>Age</u>                                                                                                      |  |
| <u>Gender</u>                                                                                                   |  |
| <u>Sample size</u>                                                                                              |  |
| <u>Level of functioning</u>                                                                                     |  |
| <u>Demographic variables - socioeconomic status (SES), geographical location and nationality, and ethnicity</u> |  |
| <u>Intervention details</u>                                                                                     |  |
| <u>Primary intervention type</u>                                                                                |  |
| <u>Agent of intervention - main agent and others involved</u>                                                   |  |
| <u>Acceptability to individual/families (social validity)</u>                                                   |  |
| <u>Aspects of play</u>                                                                                          |  |
| <u>Role of play</u>                                                                                             |  |
| <u>Level of child-control</u>                                                                                   |  |
| <u>Details/Results extracted from study (in relation to the concept of the scoping review)</u>                  |  |
| <u>Social and communication outcomes targeted</u>                                                               |  |
| <u>Long term impact measured</u>                                                                                |  |
| <u>Inclusion of generalisation phase</u>                                                                        |  |
| <u>Whether fidelity is reported and met</u>                                                                     |  |

Outcome area

Description

Social play skills

Skills used to interact and communicate with others in the context of social play. E.g. cooperative play, demonstration of shared intent, and initiating and responding to interactions in a social play context.

## Early developmental communication skills

Skills that are typically developed early in infancy and toddlerhood and are viewed as pre-requisites of later social communication skills. E.g. eye contact, joint attention and imitation.

## Social communication symptom severity

Measures of core symptoms social communication combined with interaction problems as reflected in diagnostic criteria for autism, and those reflecting broader social communication skills.

## Social cognition

Cognitive processes that enable an individual to navigate their social world. E.g. theory of mind, empathy and mentalisation, and related cognitive constructs involved in understanding other people's perspectives, intentions and social behaviour.

## Language

The development and use of the ability to understand and produce language. E.g. vocabulary, grammar and morphology, non-literal language, as well as speech characteristics like prosody, rate and volume.

## Relational skills

The success of social interaction with others, most likely with peers. E.g. developing friendships and appropriate engagement with others.

## Communication

Verbal and non-verbal language used in a social context. E.g. initiating and responding to interactions with others in a social communication context. E.g. initiating or taking turns in a conversation.

## Multiple

Where a study has measured more than one of the above categories

## **List of included studies -Scoping review of play-based interventions**

- [1] Akers Jessica S, Higbee Thomas S, Gerencser Kristina R, and Pellegrino Azure J. An Evaluation of Group Activity Schedules to Promote Social Play in Children with Autism. *Journal of Applied Behavior Analysis*, 51(3):553–570, 2018.
- [2] Akers Jessica S, Higbee Thomas S, Pollard Joy S, and Reinert Cassidy S. Sibling-Implemented Script Fading to Promote Play-Based Statements of Children with Autism. *Behavior analysis in practice*, 11(4):395–399, 2018.
- [3] Albo-Canals J, Martelo A B, Relkin E, Hannon D, Heerink M, Heinemann M, Leidl K, and Bers M U. A Pilot Study of the KIBO Robot in Children with Severe ASD. *International Journal of Social Robotics*, 10(3):371–383, 2018.
- [4] Aldred Catherine, Green Jonathan, Emsley Richard, and McConachie Helen. Brief Report: Mediation of Treatment Effect in a Communication Intervention for Pre-School Children with Autism. *Journal of Autism and Developmental Disorders*, 42(3):447–454, 2012.
- [5] Almeida L M, Silva D P.D, Theodorio D P, Silva W W, Rodrigues S C.M, Scardovelli T A, Silva A P.D, and Bissaco M A.S. ALTRIRAS: A Computer Game for Training Children with Autism Spectrum Disorder in the Recognition of Basic Emotions. *International Journal of Computer Games Technology*, 2019, 2019.

- [6] Almirall Daniel, DiStefano Charlotte, Chang Ya-Chih, Shire Stephanie, Kaiser Ann, Lu Xi, Nahum-Shani Inbal, Landa Rebecca, Mathy Pamela, and Kasari Connie. Longitudinal Effects of Adaptive Interventions With a Speech-Generating Device in Minimally Verbal Children With ASD. *Journal of Clinical Child and Adolescent Psychology: The Official Journal for the Society of Clinical Child and Adolescent Psychology, American Psychological Association, Division 53*, 45(4):442–456, 2016.
- [7] Alquraini Turki, Al-Odaib Ali, Al-Dhalaan Hesham, Merza Haniah, and Mahoney Gerald. Feasibility of Responsive Teaching With Mothers and Young Children With Autism in Saudi Arabia. *Journal of Early Intervention*, 40(4):304–316, 2018.
- [8] Anzalone Salvatore Maria, Xavier Jean, Boucenna Sofiane, Billeci Lucia, Narzisi Antonio, Muratori Filippo, Cohen David, and Chetouani Mohamed. Quantifying patterns of joint attention during human-robot interactions: An application for autism spectrum disorder assessment. *Pattern Recognition Letters*, 118(SI):42–50, 2019.
- [9] Argyropoulou Zoe, Papoudi Despina, and Zoe Argyropoulou and Despina Papoudi. The training of a child with autism in a Greek preschool inclusive class through intensive interaction: a case study. *European Journal of Special Needs Education*, 27(1):99–114, 2012.
- [10] Armendariz V and Hahs A D. Teaching Leisure Activities with Social Initiations Through Video Prompting. *Journal of Behavioral Education*, 2019.
- [11] Balch Jenifer Ware and Ray Dee C. Emotional Assets of Children With Autism Spectrum Disorder: A Single-Case Therapeutic Outcome Experiment. *Journal of Counseling and Development*, 93(4, SI):429–439, 2015.
- [12] Banerjee Mallika and Ray Sutapa Guha. Development of play therapy module for children with autism. *Journal of the Indian Academy of Applied Psychology*, 39(2):245–253, 2013.
- [13] Bangert Katherine J, Halverson Danneka M, and Finestack Lizbeth H. Evaluation of an Explicit Instructional Approach to Teach Grammatical Forms to Children With Low-Symptom Severity Autism Spectrum Disorder. *American Journal of Speech-Language Pathology*, 28(2):650–663, 2019.
- [14] Barber Angela B, Saffo Rachel W, Gilpin Ansley T, Craft Lydia D, and Goldstein Howard. Peers as clinicians: Examining the impact of Stay Play Talk on social communication in young preschoolers with autism. *Journal of Communication Disorders*, 59:1–15, 2016.
- [15] Barton Erin E. Teaching Generalized Pretend Play and Related Behaviors to Young Children With Disabilities. *Exceptional Children*, 81(4):489–506, 2015.
- [16] Barton Erin E and Wolery Mark. Training Teachers to Promote Pretend Play in Young Children With Disabilities. *Exceptional Children*, 77(1):85–106, 2010.
- [17] Beadle-Brown Julie, Wilkinson David, Richardson Lisa, Shaughnessy Nicola, Trimmingham Melissa, Leigh Jennifer, Whelton Beckie, and Himmerich Julian. Imagining Autism: Feasibility of a Drama-Based Intervention on the Social, Communicative and Imaginative Behaviour of Children with Autism. *Autism: The International Journal of Research and Practice*, 22(8):915–927, 2018.

- [18] Beaumont Renae, Rotolone Cassie, and Sofronoff Kate. The secret agent society social skills program for children with high-functioning autism spectrum disorders: A comparison of two school variants. *Psychology in the Schools*, 52(4):390–402, 2015.
- [19] Bellini Scott, Gardner Lauren, Hudock Rebekah, and Kashima-Ellingson Yuri. The Use of Video Self-Modeling and Peer Training to Increase Social Engagement in Preschool Children on the Autism Spectrum. *School Psychology Forum*, 10(2):207–219, 2016.
- [20] Berman Stav, Ventola Pamela, and Gordon Ilanit. Improvements in micro level indices of social communication following Pivotal Response Treatment (PRT). *Research in Autism Spectrum Disorders*, 51:56–65, 2018.
- [21] Berman Zuhar Rende. Increasing the Social Interaction of Two Children with Autism Spectrum Disorder and Their Peers. *International Journal of Early Childhood Special Education*, 10(2):62–74, 2018.
- [22] Bernardini Sara, Porayska-Pomsta Kaska, and Smith Tim J. ECHOES: An intelligent serious game for fostering social communication in children with autism. *Information Sciences*, 264:41–60, 2014.
- [23] Bharatharaj Jaishankar, Huang Loulin, Al-Jumaily Ahmed, Mohan Rajesh Elara, and Krageloh Chris. Sociopsychological and physiological effects of a robot-assisted therapy for children with autism. *International Journal of Advanced Robotic Systems*, 14(5), 2017.
- [24] Bieleninik Lucja, Geretsegger Monika, Mossler Karin, Assmus Jorg, Thompson Grace, Gattino Gustavo, Elefant Cochavit, Gottfried Tali, Iglizzo Roberta, Muratori Filippo, Suvini Ferdinando, Kim Jinah, Crawford Mike J, Odell-Miller Helen, Oldfield Amelia, Casey Orla, Finnemann Johanna, Carpentier John, Park A-La, Grossi Enzo, Gold Christian, and Team TIME-A Study. Effects of Improvisational Music Therapy vs Enhanced Standard Care on Symptom Severity Among Children With Autism Spectrum Disorder The TIME-A Randomized Clinical Trial. *Jama-journal of the American Medical Association*, 318(6):525–535, 2017.
- [25] Blair Kwang-Sun Cho, Lee In-Suk, Cho Su-Je, and Dunlap Glen. Positive behavior support through family-school collaboration for young children with autism. *Topics in Early Childhood Special Education*, 31(1):22–36, 2011.
- [26] Boccanfuso Laura, Scarborough Sarah, Abramson Ruth K, Hall Alicia V, Wright Harry H, and O’Kane Jason M. A low-cost socially assistive robot and robot-assisted intervention for children with autism spectrum disorder: field trials and lessons learned. *Autonomous Robots*, 41(3, SI):637–655, 2017.
- [27] Bono V, Narzisi A, Jouen A L, Tilmont E, Hommel S, Jamal W, Xavier J, Billeci L, Maharatna K, Wald M, Chetouani M, Cohen D, Muratori F, Bonfiglio S, Apicella F, Sicca F, Pioggia G, Cruciani F, Paggetti C, Giuliano A, Francisca M, Das S, Galway L, and Donnelly M. GOLIAH: A gaming platform for home-based intervention in autism - principles and design. *Frontiers in Psychiatry*, 7(APR), 2016.
- [28] Boudreau Ainsley M, Lucyshyn Joseph M, Corkum Penny, Meko Katelyn, and Smith Isabel M. Peer-Mediated Pivotal Response Treatment at School for Children With Autism Spectrum Disorder. *Canadian Journal of School Psychology*, 2019.
- [29] Boudreau Elyse and D’Entremont Barbara. Improving the pretend play skills of preschoolers with autism spectrum disorders: The effects of video modeling. *Journal of Developmental and Physical Disabilities*, 22(4):415–431, 2010.
- [30] Boudreau Jordan and Harvey Mark T. Increasing Recreational Initiations for Children Who Have ASD Using Video Self Modeling. *Education & Treatment of Children*, 36(1):49–60, 2013.
- [31] Boyd Brian A, Watson Linda R, Reszka Stephanie S, Sideris John, Alessandri Michael, Baranek Grace T, Crais Elizabeth R, Donaldson Amy, Gutierrez Anibal, Johnson LeAnne, and Belardi Katie. Efficacy of the ASAP Intervention for Preschoolers with ASD: A Cluster Randomized Controlled Trial. *Journal of Autism and Developmental Disorders*, 48(9):3144–3162, 2018.
- [32] Brian Jessica A, Smith Isabel M, Zwaigenbaum Lonnie, and Bryson Susan E. Cross-site randomized control trial of the Social ABCs caregiver-mediated intervention for toddlers with autism spectrum disorder. *Autism Research*, 10(10):1700–1711, 2017.
- [33] Brian Jessica A, Smith Isabel M, Zwaigenbaum Lonnie, Roberts Wendy, and Bryson Susan E. The Social ABCs Caregiver-Mediated Intervention for Toddlers With Autism Spectrum Disorder: Feasibility, Acceptability, and Evidence of Promise From a Multisite Study. *Autism Research*, 9(8):899–912, 2016.
- [34] Brodhead Matthew T, Higbee Thomas S, Pollard Joy S, Akers Jessica S, and Gerencser Kristina R. The use of linked activity schedules to teach children with autism to play hide-and-seek. *Journal of Applied Behavior Analysis*, 47(3):645–650, 2014.

- [35] Buggey Tom, Hoopes Grace, Sherberger Mary Elizabeth, and Williams Sarah. Facilitating Social Initiations of Preschoolers with Autism Spectrum Disorders Using Video Self-Modeling. *Focus on Autism and Other Developmental Disabilities*, 26(1):25–36, 2011.
- [36] Byford S, Cary M, Barrett B, Aldred C R, Charman T, Howlin P, Hudry K, Leadbitter K, Le Couteur, A, McConachie H, Pickles A, Slonims V, Temple K J, Green J, Bourne K, Blazey L, Holt C, Kapadia D, MacDonald W, White L, Houghton T, Taylor C, Cutress A, Leach S, Barron S, Colmer R, Randles S, Beggs K, Collino J, and The PACT Consortium. Cost-effectiveness analysis of a communication-focused therapy for pre-school children with autism: Results from a randomised controlled trial. *BMC Psychiatry*, 15(1), 2015.
- [37] Caballero Amberly and Connell James E. Evaluation of the effects of social cue cards for preschool age children with autism spectrum disorders (ASD). *Journal of Behavior Assessment and Intervention in Children*, 1(1):25–42, 2010.
- [38] Caputo Giovanni, Ippolito Giovanni, Mazzotta Marina, Sentenza Luigi, Muzio Mara Rosaria, Salzano Sara, and Conson Massimiliano. Effectiveness of a Multisystem Aquatic Therapy for Children with Autism Spectrum Disorders. *Journal of Autism and Developmental Disorders*, 48(6):1945–1956, 2018.
- [39] Cardon Teresa. Video modeling imitation training to support gestural imitation acquisition in young children with autism spectrum disorder. *Speech, Language and Hearing*, 16(4):227–238, 2013.
- [40] Cardon Teresa A. Teaching caregivers to implement video modeling imitation training via iPad for their children with autism. *Research in Autism Spectrum Disorders*, 6(4):1389–1400, 2012.
- [41] Cardon Teresa A and Wilcox M Jeanne. Promoting Imitation in Young Children with Autism: A Comparison of Reciprocal Imitation Training and Video Modeling. *J Autism Dev Disord*, 41(5):654–666, 2011.
- [42] Cariveau Tom, Shillingsburg M Alice, Alamoudi Arwa, Thompson Taylor, Bartlett Brittany, Gillespie Scott, and Scahill Lawrence. Brief Report: Feasibility and Preliminary Efficacy of a Behavioral Intervention for Minimally Verbal Girls with Autism Spectrum Disorder. *Journal of Autism and Developmental Disorders*, 49(5):2203–2209, 2019.
- [43] Carpentre John A. Investigating the Effectiveness of a Developmental, Individual Difference, Relationship-Based (DIR) Improvisational Music Therapy Program on Social Communication for Children with Autism Spectrum Disorder. *Music Therapy Perspectives*, 35(2):160–174, 2017.
- [44] Casenhiser Devin M, Shanker Stuart G, and Stieben Jim. Learning through interaction in children with autism: Preliminary data from a social-communication-based intervention. *Autism*, 17(2):220–241, 2013.
- [45] Chang Ya-Chih, Shire Stephanie Y, Shih Wendy, Gelfand Carolyn, and Kasari Connie. Preschool Deployment of Evidence-Based Social Communication Intervention: JASPER in the Classroom. *Journal of Autism and Developmental Disorders*, 46(6):2211–2223, 2016.
- [46] Charlop Marjorie H, Dennis Brian, Carpenter Michael H, and Greenberg Alissa L. Teaching Socially Expressive Behaviors to Children with Autism through Video Modeling. *Education and Treatment of Children*, 33(3):371–393, 2010.
- [47] Chiang C H, Chu C L, and Lee T C. Efficacy of caregiver-mediated joint engagement intervention for young children with autism spectrum disorders. *Autism*, 20(2):172–182, 2016.
- [48] Christensen-Sandfort Robyn J and Whinnery Stacie B. Impact of Milieu Teaching on Communication Skills of Young Children with Autism Spectrum Disorder. *Topics in Early Childhood Special Education*, 32(4):211–222, 2013.
- [49] Chu Chia-Hua and Pan Chien-Yu. The effect of peer- and sibling-assisted aquatic program on interaction behaviors and aquatic skills of children with autism spectrum disorders and their peers/siblings. *Research in Autism Spectrum Disorders*, 6(3):1211–1223, 2012.
- [50] Cihon Joseph H, Ferguson Julia L, Leaf Justin B, Leaf Ronald, McEachin John, and Taubman Mitchell. Use of a Level System with Flexible Shaping to Improve Synchronous Engagement. *Behavior Analysis in Practice*, 12(1):44–51, 2019.
- [51] Colombi C, Narzisi A, Ruta L, Cigala V, Gagliano A, Pioggia G, Siracusano R, Rogers S J, Muratori F, and Prima Pietra Team. Implementation of the Early Start Denver Model in an Italian community. *Autism*, 22(2):126–133, 2018.
- [52] Coogler Christan Grygas, Ottley Jennifer R, Storie Sloan, Rahn Naomi L, and Burt Amy Kurowski. eCoaching to Enhance Special Educator Practice and Child Outcomes. *Infants & Young Children*, 30(1):58–75, 2017.

- [53] Coolican J, Smith I M, and Bryson S E. Brief parent training in pivotal response treatment for preschoolers with autism. *Journal of Child Psychology and Psychiatry and Allied Disciplines*, 51(12):1321–1330, 2010.
- [54] Corbett Blythe A, Gunther Joan R, Comins Dan, Price Jenifer, Ryan Niles, Simon David, Schupp Clayton W, and Rios Taylor. Brief Report: Theatre as Therapy for Children with Autism Spectrum Disorder. *Journal of Autism and Developmental Disorders*, 41(4):505–511, 2011.
- [55] Daniels Jena, Schwartz Jessey N, Voss Catalin, Haber Nick, Fazel Azar, Kline Aaron, Washington Peter, Feinstein Carl, Winograd Terry, and Wall Dennis P. Exploratory study examining the at-home feasibility of a wearable tool for social-affective learning in children with autism. *Npj Digital Medicine*, 1, 2018.
- [56] Dawson Geraldine, Rogers Sally, Munson Jeffrey, Smith Milani, Winter Jamie, Greenson Jessica, Donaldson Amy, and Varley Jennifer. Randomized, Controlled Trial of an Intervention for Toddlers With Autism: The Early Start Denver Model. *Pediatrics*, 125(1):E17–E23, 2010.
- [57] Diamond G, Ofek H, Aronson B, Viner-Ribke I, Dlugatch Y, and Resnick E. Hybrid therapy for treatment of newly diagnosed toddlers with autism spectrum disorders. *International Journal on Disability and Human Development*, 2015, 2015.
- [58] Dickinson Kathleen and Place Maurice. The Impact of a Computer-Based Activity Program on the Social Functioning of Children with Autistic Spectrum Disorder. *Games for Health Journal*, 5(3):209–215, 2016.
- [59] Didehbani Nyaz, Allen Tandra, Kandalaf Michelle, Krawczyk Daniel, and Chapman Sandra. Virtual Reality Social Cognition Training for children with high functioning autism. *Computers in Human Behavior*, 62:703–711, 2016.
- [60] Dionne Maryse and Martini Rose. Floor time play with a child with autism: A single-subject study. *Canadian Journal of Occupational Therapy / Revue Canadienne D'Ergotherapie*, 78(3):196–203, 2011.
- [61] DiStefano Charlotte, Shih Wendy, Kaiser Ann, Landa Rebecca, and Kasari Connie. Communication growth in minimally verbal children with ASD: The importance of interaction. *Autism Research: Official Journal of the International Society for Autism Research*, 9(10):1093–1102, 2016.
- [62] Divan Gauri, Vajaratkar Vivek, Cardozo Percy, Huzurbazar Shilpa, Verma Mamta, Howarth Elizabeth, Emsley Richard, Taylor Carol, Patel Vikram, and Green Jonathan. The Feasibility and Effectiveness of PASS Plus, A Lay Health Worker Delivered Comprehensive Intervention for Autism Spectrum Disorders: Pilot RCT in a Rural Low and Middle Income Country Setting. *Autism Research*, 12(2):328–339, 2019.
- [63] Dos Santos, A C, Ribeiro I F, Garotti M F, and Bosa C A. Intervention in Autism: Social engagement implemented by caregivers. *Paideia*, 25(60):67–75, 2015.
- [64] Douglas Sarah N, Kammes Rebecca, and Nordquist Erica. Online Communication Training for Parents of Children with Autism Spectrum Disorder. *Communication Disorders Quarterly*, 39(3):415–425, 2018.
- [65] Douglas Sarah N, McNaughton David, and Light Janice. Online Training for Paraeducators to Support the Communication of Young Children. *Journal of Early Intervention*, 35(3):223–242, 2013.
- [66] Duenas Ana D, Plavnick Joshua B, and Bak M Y. Savana. Effects of Joint Video Modeling on Unscripted Play Behavior of Children with Autism Spectrum Disorder. *Journal of Autism and Developmental Disorders*, 49(1):236–247, 2019.
- [67] Duenas Ana D, Plavnick Joshua B, and Maher Courtney E. Embedding Tact Instruction during Play for Preschool Children with Autism Spectrum Disorder. *Education and Treatment of Children*, 42(3):361–384, 2019.
- [68] Dyer Kathleen and Karp Rebecca. A staff-training program to increase spontaneous vocal requests in children with autism. *Behavior Analysis in Practice*, 6(2):42–60, 2013.
- [69] Dykstra Jessica R, Boyd Brian A, Watson Linda R, Crais Elizabeth R, Baranek Grace T, Jessica R Dykstra, Brian A Boyd, Linda R Watson, Elizabeth R Crais, and Grace T Baranek. The impact of the Advancing Social-communication And Play (ASAP) intervention on preschoolers with autism spectrum disorder. *Autism: The International Journal of Research & Practice*, 16(1):27–44, 2012.
- [70] Eapen Valsamma, CrnÄec Rudi, and Walter Amelia. Clinical outcomes of an early intervention program for preschool children with Autism Spectrum Disorder in a community group setting. *BMC pediatrics*, 13(1):3, 2013.
- [71] Elder Jennifer H, Donaldson Susan O, Kairalla John, Valcante Gregory, Bendixen Roxanna, Ferdig Richard, Self Erica, Walker Jeffrey, Palau Christina, and Serrano Michele. In-Home Training for Fathers of Children with Autism: A Follow up Study and Evaluation of Four Individual Training Components. *Journal of Child and Family Studies*, 20(3):263–271, 2011.

- [72] Eldevik S, Hastings R P, Jahr E, and Hughes J C. Outcomes of behavioral intervention for children with autism in mainstream pre-school settings. *Journal of Autism and Developmental Disorders*, 42(2):210–220, 2012.
- [73] Esposito Marco, Sloan Janette, Tancredi Andrea, Gerardi Giovanna, Postiglione Paola, Fotia Francesca, Napoli Eleonora, Mazzone Luigi, Valeri Giovanni, and Vicari Stefano. Using Tablet Applications for Children with Autism to Increase Their Cognitive and Social Skills. *Journal of Special Education Technology*, 32(4):199–209, 2017.
- [74] Estes Annette, Munson Jeffrey, Rogers Sally J, Greenson Jessica, Winter Jamie, and Dawson Geraldine. Long-Term Outcomes of Early Intervention in 6-Year-Old Children With Autism Spectrum Disorder. *Journal of the American Academy of Child and Adolescent Psychiatry*, 54(7):580–587, 2015.
- [75] Ezell Shauna, Field Tiffany, Nadel Jacqueline, Newton Rae, Murrey Greg, Siddalingappa Vijaya, Allender Susan, and Grace Ava. Imitation effects on joint attention behaviors of children with autism. *Psychology*, 3(9):681–685, 2012.
- [76] Ezzeddine Essma W, DeBar Ruth M, Reeve Sharon A, and Townsend Dawn Buffington. Using video modeling to teach play comments to dyads with ASD. *JOURNAL OF APPLIED BEHAVIOR ANALYSIS*, 2019.
- [77] Feldman Eileen Klein and Matos Rosy. Training paraprofessionals to facilitate social interactions between children with autism and their typically developing peers. *Journal of Positive Behavior Interventions*, 15(3):169–179, 2013.
- [78] Ferguson Bill R, Gillis Jennifer M, and Sevlever Melina. A Brief Group Intervention Using Video Games to Teach Sportsmanship Skills to Children With Autism Spectrum Disorders. *Child & Family Behavior Therapy*, 35(4):293–306, 2013.
- [79] Fernandes F D.M, de La Higuera Amato, C A, Balestro J I, and Molini-Avejonas D R. Orientation to mothers of children of the autistic spectrum about language and communication. *Jornal da Sociedade Brasileira de Fonoaudiologia*, 23(1):1–7, 2011.
- [80] Fernandes F D.M, Santos T H.F, De La Higuera Amato, C A, and Molini-Avejonas D R. Computerized resources in language therapy with children of the autistic spectrum. *Pro-Fono*, 22(4):415–420, 2010.
- [81] Ferraioli Suzannah J and Harris Sandra L. TEACHING JOINT ATTENTION TO CHILDREN WITH AUTISM THROUGH A SIBLING-MEDIATED BEHAVIORAL INTERVENTION. *Behavioral Interventions*, 26(4):261–281, 2011.
- [82] Field Tiffany, Ezell Shauna, Nadel Jacqueline, Grace Ava, Allender Susan, and Siddalingappa Vijaya. Reciprocal imitation following adult imitation by children with autism. *Infant and Child Development*, 22(6):642–648, 2013.
- [83] Finnigan Emily and Starr Elizabeth. Increasing Social Responsiveness in a Child with Autism: A Comparison of Music and Non-Music Interventions. *Autism: The International Journal of Research and Practice*, 14(4):321–348, 2010.
- [84] Fletcher-Watson Sue, Petrou Alexandra, Scott-Barrett Juliet, Dicks Pamela, Graham Catherine, O'Hare Anne, Pain Helen, and McConachie Helen. A trial of an iPad<sup>®</sup> intervention targeting social communication skills in children with autism. *Autism*, 20(7):771–782, 2016.
- [85] Fossum K L, Williams L, Garon N, Bryson S E, and Smith I M. Pivotal response treatment for preschoolers with autism spectrum disorder: Defining a predictor profile. *Autism Research*, 11(1):153–165, 2018.
- [86] Franco Jessica H, Davis Barbara L, and Davis John L. Increasing Social Interaction Using Prelinguistic Milieu Teaching with Nonverbal School-Age Children with Autism. *American Journal of Speech-Language Pathology*, 22(3):489–502, 2013.
- [87] Frankel Fred, Myatt Robert, Sugar Catherine, Whitham Cynthia, Gorospe Clarissa M, and Laugeson Elizabeth. A randomized controlled study of parent-assisted Children's Friendship Training with children having autism spectrum disorders. *Journal of Autism and Developmental Disorders*, 40(7):827–842, 2010.
- [88] FranÃ§ois DorothÃ©e, Powell Stuart, and Dautenhahn Kerstin. A long-term study of children with autism playing with a robotic pet: Taking inspirations from non-directive play therapy to encourage children's proactivity and initiative-taking. *Interaction Studies: Social Behaviour and Communication in Biological and Artificial Systems*, 10(3):324–373, 2009.
- [89] Freitag Christine M, Feineis-Matthews Sabine, Valerian Jennifer, Teufel Karoline, and Wilker Christian. The Frankfurt early intervention program FFIP for preschool aged children with autism spectrum disorder: A pilot study. *Journal of Neural Transmission*, 119(9):1011–1021, 2012.

- [90] Fridenson-Hayo S, Berggren S, Lassalle A, Tal S, Pigat D, Meir-Goren N, O'Reilly H, Ben-Zur S, BÅllte S, Baron-Cohen S, and Golan O. "Emotiplay": A serious game for learning about emotions in children with autism: Results of a cross-cultural evaluation. *European Child & Adolescent Psychiatry*, 26(8):979–992, 2017.
- [91] Friedrich Elisabeth V.C, Sivanathan Aparajithan, Lim Theodore, Suttie Neil, Louchart Sandy, Pillen Steven, and Pineda Jaime A. An Effective Neurofeedback Intervention to Improve Social Interactions in Children with Autism Spectrum Disorder. *Journal of Autism and Developmental Disorders*, 45(12):4084–4100, 2015.
- [92] Fulton Elizabeth, Eapen Valsamma, Crncec Rudi, Walter Amelia, and Rogers Sally. Reducing maladaptive behaviors in preschool-aged children with autism spectrum disorder using the Early Start Denver Model. *Frontiers in Pediatrics*, 2, 2014.
- [93] Furukawa Kokoro, Okuno Hiroko, Mohri Ikuko, Nakanishi Mariko, Eyberg Sheila M, and Sakai Saeko. Effectiveness of Child-Directed Interaction Training for Young Japanese Children With Autism Spectrum Disorders. *Child & Family Behavior Therapy*, 40(2):166–186, 2018.
- [94] Gadaire Dana M, Bartell Katrina, and Villacorta Jamie. Evaluating group activity schedules to promote social play in children with autism. *Learn Motiv*, 64:18–26, 2018.
- [95] Gengoux Grace W, Abrams Daniel A, Schuck Rachel, Millan Maria Estefania, Libove Robin, Ardel Christina M, Phillips Jennifer M, Fox Melanie, Frazier Thomas W, and Hardan Antonio Y. A Pivotal Response Treatment Package for Children With Autism Spectrum Disorder: An RCT. *Pediatrics*, 144(3), 2019.
- [96] Gengoux Grace W, Schapp Salena, Burton Sarah, Ardel Christina M, Libove Robin A, Baldi Gina, Berquist Kari L, Phillips Jennifer M, and Hardan Antonio Y. Effects of a parent-implemented Developmental Reciprocity Treatment Program for children with autism spectrum disorder. *Autism*, 23(3):713–725, 2019.
- [97] Geoffroy Marie-Maude, Denis AngÃ©lique, Mengarelli Flavia, Peter ChloÃ©, Gallifet Natacha, Beaujeard Valentin, Grosmaître CÃ©line Jacob, Malo ValÃ©ry, Grisi Stephane, Georgieff Nicolas, Magnificat Sabine, and Touzet Sandrine. Using ESDM 12 hours per week in children with autism spectrum disorder: feasibility and results of an observational study. *Psychiatria Danubina*, 31(3):333–339, 2019.
- [98] Gerow Stephanie, Rispoli Mandy, Gregori Emily, and Sanchez Lisa. Parent-Implemented Trial-Based Functional Analysis for Young Children With ASD. *Focus on Autism and Other Developmental Disabilities*, 34(1):29–40, 2019.
- [99] Gerritsen Jan. The Effect of Tomatis Therapy on Children with Autism: Eleven Case Studies. *International Journal of Listening*, 24(1):50–68, 2010.
- [100] Ginn Nicole C, Clionsky Leah N, Eyberg Sheila M, Warner-Metzger Christina, and Abner John-Paul. Child-directed interaction training for young children with autism spectrum disorders: Parent and child outcomes. *Journal of Clinical Child and Adolescent Psychology*, 46(1):101–109, 2017.
- [101] Gitimoghaddam Mojgan, McKellin William H, Millert Anton R, Weiss Jonathan A, Majnemer Annette, Masse Louise C, Brant Rollin, Symington Vivien, Wishart Robert L, and Collet Jean-Paul. Gymnastic-Based Movement Therapy for Children With Neurodevelopmental Disabilities: Results From a Pilot Feasibility Study. *Frontiers in Pediatrics*, 7, 2019.
- [102] Gomes S R, Reeve S A, Brothers K J, Reeve K F, and Sidener T M. Establishing a Generalized Repertoire of Initiating Bids for Joint Attention in Children with Autism. 2019.
- [103] Goodrich Michael A, Colton Mark, Brinton Bonnie, Fujiki Martin, Atherton J Alan, Robinson Lee, Ricks Daniel, Maxfield Margaret Hansen, and Acerson Aersta. Incorporating a Robot into an Autism Therapy Team. *Ieee Intelligent Systems*, 27(2):52–59, 2012.
- [104] Goods Kelly Stickles, Ishijima Eric, Chang Ya-Chih, and Kasari Connie. Preschool based JASPER intervention in minimally verbal children with autism: pilot RCT. *Journal of Autism and Developmental Disorders*, 43(5):1050–1056, 2013.
- [105] Gordon Iris, Pierce Matthew D, Bartlett Marian S, and Tanaka James W. Training facial expression production in children on the autism spectrum. *Journal of Autism and Developmental Disorders*, 44(10):2486–2498, 2014.
- [106] Green J, Charman T, McConachie H, Aldred C, Slonims V, Howlin P, Le Couteur, A, Leadbitter K, Hudry K, Byford S, Barrett B, Temple K, Macdonald W, and Pickles A. Parent-mediated communication-focused treatment in children with autism (PACT): a randomised controlled trial. *The Lancet*, 375(9732):2152–2160, 2010.
- [107] Greer R Douglas, Pistoljevic Nirvana, Cahill Claire, and Du Lin. Effects of conditioning voices as reinforcers for listener responses on rate of learning, awareness, and preferences for listening to stories in preschoolers with autism. *Analysis of Verbal Behavior*, 27:103–124, 2011.



- [108] Grosberg Denise and Charlop Marjorie. Teaching Persistence in Social Initiation Bids to Children with Autism Through a Portable Video Modeling Intervention (PVMl). *Journal of Developmental and Physical Disabilities*, 26(5):527–541, 2014.
- [109] Grosberg Denise and Charlop Marjorie H. Teaching Conversational Speech to Children with Autism Spectrum Disorder Using Text-Message Prompting. *Journal of Applied Behavior Analysis*, 50(4):789–804, 2017.
- [110] Groskreutz Mark P, Peters Amy, Groskreutz Nicole C, and Higbee Thomas S. Increasing play-based commenting in children with autism spectrum disorder using a novel script-frame procedure. *Journal of Applied Behavior Analysis*, 48(2):442–447, 2015.
- [111] Grygas Coogle, Christan, Ottley Jennifer R, Rahn Naomi L, and Storie Sloan. Bug-in-Ear eCoaching: Impacts on Novice Early Childhood Special Education Teachers. *Journal of Early Intervention*, 40(1):87–103, 2018.
- [112] Gulsrud Amanda C, Hellemann Gerhard S, Freeman Stephanny F.N, and Kasari Connie. Two to ten years: Developmental trajectories of joint attention in children with ASD who received targeted social communication interventions. *Autism Research*, 7(2):207–215, 2014.
- [113] Gupta Babita. Theory of mind in autism: A case study. *Psychological Studies*, 60(3):339–345, 2015.
- [114] Guðmundsdóttir Kristín, Ala'i-Rosales Shahla, and Sigurðardóttir Zuilma Gabriela. Extending Caregiver Training via Telecommunication for Rural Icelandic Children with Autism. *Rural Special Education Quarterly*, 38(1): 26–42, 2019.
- [115] Guðmundsdóttir Kristín, Sigurðardóttir Zuilma Gabriela, and Ala'i-Rosales Shahla. Evaluation of caregiver training via telecommunication for rural Icelandic children with autism. *Behavioral Development Bulletin*, 22(1): 215–229, 2017.
- [116] Hampton L H, Harty M, Fuller E A, and Kaiser A P. Enhanced milieu teaching for children with autism spectrum disorder in South Africa. *International Journal of Speech-Language Pathology*, 2019.
- [117] Harjusola-Webb Sanna M and Robbins Sandra Hess. The Effects of Teacher-Implemented Naturalistic Intervention on the Communication of Preschoolers with Autism. *Topics in Early Childhood Special Education*, 32(2):99–110, 2012.
- [118] Hart Stephanie L and Banda Devender R. Examining the Effects of Peer Mediation on the Social Skills of Students with Autism Spectrum Disorder as Compared to Their Peers. *Education and Training in Autism and Developmental Disabilities*, 53(2):160–175, 2018.
- [119] Hassan Mahfuz, Simpson Andrea, Danaher Katey, Haesen James, Makela Tanya, and Thomson Kendra. An Evaluation of Behavioral Skills Training for Teaching Caregivers How to Support Social Skill Development in Their Child with Autism Spectrum Disorder. *Journal of Autism and Developmental Disorders*, 48(6):1957–1970, 2018.
- [120] Hatami Samira and Rahmani Fatemeh. Investigating the effectiveness of play therapy in improving cognitive-behavioral symptoms of autistic disorder. *Bioscience Biotechnology Research Communications*, 10(1, SI):249–254, 2017.
- [121] Herbrecht Evelyn, Kievit Esther, Spiegel RenÃ©, Dima Diana, Goth Kirstin, and Schmeck Klaus. Become re-lated: FIAS, an intensive early intervention for young children with autism spectrum disorders. *Psychopathology*, 48(3):162–172, 2015.
- [122] Hernandez-Ruiz Eugenia. Music Therapy and Early Start Denver Model to Teach Social Communication Strategies to Parents of Preschoolers with ASD: A Feasibility Study. *Music Therapy Perspectives*, 36(1):26–39, 2018.
- [123] Hiles Howard, Amanda R, Lindaman Sandra, Copeland Rachel, and Cross David R. Theraplay impact on parents and children with autism spectrum disorder: Improvements in affect, joint attention, and social cooperation. *International Journal of Play Therapy*, 27(1):56–68, 2018.
- [124] Ho T Q, Gadke D L, Henington C, Evans-McCleon T N, and Justice C A. The effects of animated video modeling on joint attention and social engagement in children with autism spectrum disorder. *Research in Autism Spectrum Disorders*, 58:83–95, 2019.
- [125] Holzinger Daniel, Laister Dominik, Vivanti Giacomo, Barbaresi William Joseph, and Fellingner Johannes. Feasibility and outcomes of the Early Start Denver Model implemented with low intensity in a community setting in Austria. *Journal of Developmental and Behavioral Pediatrics*, 40(5):354–363, 2019.
- [126] Hong Ee Rea, Gong Liyuan, Ganz Jennifer B, and Neely Leslie. Self-Paced and Video-Based Learning: Parent Training and Language Skills in Japanese Children with ASD. *Exceptionality Education International*, 28(2):1–19, 2018.

- [127] Hopkins Ingrid Maria, Gower Michael W, Perez Trista A, Smith Dana S, Amthor Franklin R, Wimsatt F Casey, and Biasini Fred J. Avatar Assistant: Improving Social Skills in Students with an ASD through a Computer-Based Intervention. *Journal of Autism and Developmental Disorders*, 41(11):1543–1555, 2011.
- [128] Houghton Kat, Schuchard Julia, Lewis Charlie, and Thompson Cynthia K. Promoting child-initiated social-communication in children with autism: Son-Rise Program intervention effects. *Journal of Communication Disorders*, 46(5-6):495–506, 2013.
- [129] Hu Xiaoyi, Zheng Qunshan, and Lee Gabrielle T. Using Peer-Mediated LEGO® Play Intervention to Improve Social Interactions for Chinese Children with Autism in an Inclusive Setting. *Journal of Autism and Developmental Disorders*, 48(7):2444–2457, 2018.
- [130] Hundert Joel, Rowe Sarah, and Harrison Erin. The Combined Effects of Social Script Training and Peer Buddies on Generalized Peer Interaction of Children with ASD in Inclusive Classrooms. *Focus on Autism and Other Developmental Disabilities*, 29(4):206–215, 2014.
- [131] Huskens Bibi, Palmen Annemiek, Van der Werff, Marije, Lourens Tino, and Barakova Emilia. Improving Collaborative Play between Children with Autism Spectrum Disorders and Their Siblings: The Effectiveness of a Robot-Mediated Intervention Based on Lego® Therapy. *Journal of Autism and Developmental Disorders*, 45(11):3746–3755, 2015.
- [132] Ichikawa Kayoko, Takahashi Yoshimitsu, Ando Masahiko, Anme Tokie, Ishizaki Tatsuro, Yamaguchi Hinako, and Nakayama Takeo. TEACCH-based group social skills training for children with high-functioning autism: A pilot randomized controlled trial. *BioPsychoSocial Medicine*, 7, 2013.
- [133] Ingersoll Brooke. Brief Report: Pilot Randomized Controlled Trial of Reciprocal Imitation Training for Teaching Elicited and Spontaneous Imitation to Children with Autism. *Journal of Autism and Developmental Disorders*, 40(9):1154–1160, 2010.
- [134] Ingersoll Brooke. The differential effect of three naturalistic language interventions on language use in children with autism. *Journal of Positive Behavior Interventions*, 13(2):109–118, 2011.
- [135] Ingersoll Brooke. Brief report: effect of a focused imitation intervention on social functioning in children with autism. *Journal of Autism and Developmental Disorders*, 42(8):1768–1773, 2012.
- [136] Ingersoll Brooke and Lalonde Katherine. The Impact of Object and Gesture Imitation Training on Language Use in Children with Autism Spectrum Disorder. *Journal of Speech, Language, and Hearing Research*, 53(4):1040–1051, 2010.
- [137] Ingersoll Brooke, Meyer Katherine, Bonter Nicole, and Jelinek Sara. A Comparison of Developmental Social-Pragmatic and Naturalistic Behavioral Interventions on Language Use and Social Engagement in Children with Autism. *Journal of Speech, Language, and Hearing Research*, 55(5):1301–1313, 2012.
- [138] Ingersoll Brooke and Wainer Allison. Initial efficacy of Project ImpACT: A parent-mediated social communication intervention for young children with ASD. *Journal of Autism and Developmental Disorders*, 43(12):2943–2952, 2013.
- [139] Ingersoll Brooke, Wainer Allison L, Berger Natalie I, Pickard Katherine E, and Bonter Nicole. Comparison of a Self-Directed and Therapist-Assisted Telehealth Parent-Mediated Intervention for Children with ASD: A Pilot RCT. *Journal of Autism and Developmental Disorders*, 46(7):2275–2284, 2016.
- [140] Ingersoll Brooke R and Wainer Allison L. Pilot study of a school-based parent training program for preschoolers with ASD. *Autism: The International Journal of Research and Practice*, 17(4):434–448, 2013.
- [141] Ingersoll Brooke R, Wainer Allison L, Berger Natalie I, and Walton Katherine M. Efficacy of low intensity, therapist-implemented Project ImpACT for increasing social communication skills in young children with ASD. *Developmental Neurorehabilitation*, 20(8):502–510, 2017.
- [142] Ip Horace H. S, Wong Simpson W. L, Chan Dorothy F. Y, Byrne Julia, Li Chen, Yuan Vanessa S. N, Lau Kate S. Y, and Wong Joe Y. W. Enhance emotional and social adaptation skills for children with autism spectrum disorder: A virtual reality enabled approach. *Computers & Education*, 117:1–15, 2018.
- [143] Janina Kitzerow, Karoline Teufel, Katrin Jensen, Christian Wilker, and Christine M Freitag. Case-control study of the low intensive autism-specific early behavioral intervention A-FFIP: Outcome after one year. *Zeitschrift für Kinder- und Jugendpsychiatrie und Psychotherapie*, 2019.
- [144] Janson Birgitta Spjut, Heimann Mikael, and Tjus Tomas. Comparing Imitation Responding and IBT for children with ASD, a preschool intervention. *Journal of Research in Special Educational Needs*, 2019.

- [145] Javed H and Park C H. Interactions with an Empathetic Agent: Regulating Emotions and Improving Engagement in Autism. *IEEE Robotics and Automation Magazine*, 26(2):40–48, 2019.
- [146] Jeffries Tricia, Crosland Kimberly, and Miltenberger Raymond. Evaluating a tablet application and differential reinforcement to increase eye contact in children with autism. *Journal of Applied Behavior Analysis*, 49(1):182–187, 2016.
- [147] Emily A. Jones. Establishing response and stimulus classes for initiating joint attention in children with autism. *Research in Autism Spectrum Disorders*, 3(2):375–389, apr 2009.
- [148] Jones JoAnna, Lerman Dorothea C, and Lechago Sarah. Assessing stimulus control and promoting generalization via video modeling when teaching social responses to children with autism. *Journal of Applied Behavior Analysis*, 47(1):37–50, 2014.
- [149] Jouen A L, Narzisi A, Xavier J, Tilmont E, Bodeau N, Bono V, Ketem-Premel N, Anzalone S, Maharatna K, Chetouani M, Muratori F, Cohen D, Bonfiglio S, Apicella F, Sicca F, Billeci L, Pioviglia G, Cruciani F, Paggetti C, Giuliano A, Francisa M, Das S, Jamal W, Galway L, Donnelly M, and MICHELANGELO Study Group. GO- LIAH (Gaming open library for intervention in autism at home): A 6-month single blind matched controlled exploratory study. *Child and Adolescent Psychiatry and Mental Health*, 11(1), 2017.
- [150] Julien H M and Reichle J. A comparison of high and low dosages of a component of milieu teaching strategies for two preschool-age learners with autism spectrum disorder. *Language, Speech, and Hearing Services in Schools*, 47(1):87–98, 2016.
- [151] Jull Stephanie and Mirenda Pat. Parents as Play Date Facilitators for Preschoolers with Autism. *Journal of Positive Behavior Interventions*, 13(1):17–30, 2011.
- [152] Jung Sunhwa and Sainato Diane M. Teaching games to young children with autism spectrum disorder using special interests and video modelling. *Journal of Intellectual and Developmental Disability*, 40(2):198–212, 2015.
- [153] Kaale Anett, Fagerland Morten W, Martinsen Egil W, and Smith Lars. Preschool-Based Social Communication Treatment for Children With Autism: 12-Month Follow-Up of a Randomized Trial. *Journal of the American Academy of Child and Adolescent Psychiatry*, 53(2):188–198, 2014.
- [154] Kaale Anett, Smith Lars, and Sponheim Eili. A randomized controlled trial of preschool-based joint attention intervention for children with autism. *Journal of Child Psychology and Psychiatry, and Allied Disciplines*, 53(1):97–105, 2012.
- [155] Kaiser Ann P and Roberts Megan Y. Parent-implemented enhanced milieu teaching with preschool children who have intellectual disabilities. *Journal of Speech, Language, and Hearing Research*, 56(1):295–309, 2013.
- [156] Kaminski Ami J, Fisher Wayne W, Greer Brian D, and Akers Jessica S. Increasing sharing in children with autism spectrum disorder using automated discriminative stimuli. *Learning and Motivation*, 62(SI):41–50, 2018.
- [157] Kamps Debra, Mason Rose, Thiemann-Bourque Kathy, Feldmiller Sarah, Turcotte Amy, and Miller Todd. The use of peer networks to increase communicative acts of students with autism spectrum disorders. *Focus on Autism and Other Developmental Disabilities*, 29(4):230–245, 2014.
- [158] Kamps Debra, Thiemann-Bourque Kathy, Heitzman-Powell Linda, Schwartz Ilene, Rosenberg Nancy, Mason Rose, and Cox Suzanne. A comprehensive peer network intervention to improve social communication of children with autism spectrum disorders: A randomized trial in Kindergarten and First grade. *Journal of Autism and Developmental Disorders*, 45(6):1809–1824, 2015.
- [159] Karakosta E, Dautenhahn K, Syrdal D S, Wood L J, and Robins B. Using the humanoid robot Kaspar in a Greek school environment to support children with Autism Spectrum Condition. *Paladyn*, 10(1):298–317, 2019.
- [160] Kasari C, Lawton K, Shih W, Barker T V, Landa R, Lord C, Orlich F, King B, Wetherby A, and Senturk D. Caregiver-mediated intervention for low-resourced preschoolers with autism: An RCT. *Pediatrics*, 134(1):e72–e79, 2014.
- [161] Kasari Connie, Dean Michelle, Kretzmann Mark, Shih Wendy, Orlich Felice, Whitney Rondalyn, Landa Rebecca, Lord Catherine, and King Bryan. Children with autism spectrum disorder and social skills groups at school: a randomized trial comparing intervention approach and peer composition. *Journal of Child Psychology and Psychiatry, and Allied Disciplines*, 57(2):171–179, 2016.
- [162] Kasari Connie, Gulsrud Amanda, Freeman Stephanny, Paparella Tanya, and Helleman Gerhard. Longitudinal follow-up of children with autism receiving targeted interventions on joint attention and play. *Journal of the American Academy of Child and Adolescent Psychiatry*, 51(5):487–495, 2012.

- [163] Kasari Connie, Gulsrud Amanda, Paparella Tanya, Hellemann Gerhard, and Berry Kathleen. Randomized comparative efficacy study of parent-mediated interventions for toddlers with autism. *Journal of Consulting and Clinical Psychology*, 83(3):554–563, 2015.
- [164] Kasari Connie, Gulsrud Amanda C, Wong Connie, Kwon Susan, and Locke Jill. Randomized Controlled Care-giver Mediated Joint Engagement Intervention for Toddlers with Autism. *Journal of Autism and Developmental Disorders*, 40(9):1045–1056, 2010.
- [165] Kasari Connie, Kaiser Ann, Goods Kelly, Nietfeld Jennifer, Mathy Pamela, Landa Rebecca, Murphy Susan, and Almirall Daniel. Communication interventions for minimally verbal children with autism: a sequential multiple assignment randomized trial. *Journal of the American Academy of Child and Adolescent Psychiatry*, 53(6):635–646, 2014.
- [166] Kasari Connie, Rotheram-Fuller Erin, Locke Jill, and Gulsrud Amanda. Making the connection: randomized controlled trial of social skills at school for children with autism spectrum disorders. *Journal of Child Psychology and Psychiatry, and Allied Disciplines*, 53(4):431–439, 2012.
- [167] Kassardjian Alyne, Leaf Justin B, Ravid Daniel, Leaf Jeremy A, Alcalay Aditt, Dale Stephanie, Tsuji Kathleen, Taubman Mitchell, Leaf Ronald, McEachin John, and Oppenheim-Leaf Misty L. Comparing the teaching interaction procedure to social stories: A replication study. *Journal of Autism and Developmental Disorders*, 44(9):2329–2340, 2014.
- [168] Katagiri Masatoshi, Inada Naoko, and Kamio Yoko. Mirroring effect in 2- and 3-year-olds with autism spectrum disorder. *Research in Autism Spectrum Disorders*, 4(3):474–478, 2010.
- [169] Katz Esther and Girolametto Luigi. Peer-mediated intervention for preschoolers with ASD implemented in early childhood education settings. *Topics in Early Childhood Special Education*, 33(3):133–143, 2013.
- [170] Katz Esther and Girolametto Luigi. Peer-mediated intervention for pre-schoolers with ASD: Effects on responses and initiations. *International Journal of Speech-Language Pathology*, 17(6):565–576, 2015.
- [171] Kemp Coral, Stephenson Jennifer, Cooper Megan, and Hodge Kerry. The Use of Peer Mediation and Educator Facilitation to Promote Turn Taking in Young Children with Autism Spectrum Disorder in Inclusive Childcare. *Infants and Young Children*, 32(3):151–171, 2019.
- [172] Kent Cally, Cordier Reinie, Joosten Annette, Wilkes-Gillan Sarah, and Bundy Anita. Peer-mediated intervention to improve play skills in children with autism spectrum disorder: A feasibility study. *Australian Occupational Therapy Journal*, 65(3):176–186, 2018.
- [173] Ketcheson Leah, Hauck Janet, and Ulrich Dale. The Effects of an Early Motor Skill Intervention on Motor Skills, Levels of Physical Activity, and Socialization in Young Children with Autism Spectrum Disorder: A Pilot Study. *Autism: The International Journal of Research and Practice*, 21(4):481–492, 2017.
- [174] Killmeyer Susan, Kaczmarek Louise, Kostewicz Douglas, and Yelich Amy. Contingent Imitation and Young Children At-Risk for Autism Spectrum Disorder. *Journal of Early Intervention*, 41(2):141–158, 2019.
- [175] Kim Jinah, Wigram Tony, and Gold Christian. Emotional, motivational and interpersonal responsiveness of children with autism in improvisational music therapy. *Autism: The International Journal of Research and Practice*, 13(4):389–409, 2009.
- [176] Kim Sunny, Koegel Robert L, and Koegel Lynn K. Training paraprofessionals to target socialization in students with ASD: Fidelity of implementation and social validity. *Journal of Positive Behavior Interventions*, 19(2):102–114, 2017.
- [177] Kim Sunyoung. Use of Video Modeling to Teach Developmentally Appropriate Play with Korean American Children with Autism. *Research and Practice for Persons with Severe Disabilities*, 41(3):158–172, 2016.
- [178] Kim Sunyoung. Pivotal response treatment for prompting social behaviors of Korean American children with autism. *Exceptionality*, 27(1):47–64, 2019.
- [179] Kitzerow Janina, Wilker Christian, Teufel Karoline, Soll Sophie, Schneider Monika, Westerwald Eva, Sachse Michael, Marinovic Vesna, Berndt Kerstin, Valerian Jennifer, Feineis-Matthews Sabine, and Freitag Christine M. Frankfurt Early Intervention Program (FFIP) for preschoolers with Autism Spectrum Disorders (ASD): First results for language development. *Kindheit Und Entwicklung*, 23(1):34–41, 2014.
- [180] Kleeberger Vickie and Mirenda Pat. Teaching Generalized Imitation Skills to a Preschooler With Autism Using Video Modeling. *Journal of Positive Behavior Interventions*, 12(2):116–127, 2010.

- [181] Koegel Lynn K, Kuriakose Sarah, Singh Anjileen K, and Koegel Robert L. Improving generalization of peer socialization gains in inclusive school settings using initiations training. *Behavior Modification*, 36(3):361–377, 2012.
- [182] Koegel Lynn Kern, Glugatch Lindsay B, Koegel Robert L, and Castellon Fernanda A. Targeting IEP Social Goals for Children with Autism in an Inclusive Summer Camp. *Journal of Autism and Developmental Disorders*, 49(6):2426–2436, 2019.
- [183] Koegel Robert L, Bradshaw Jessica L, Ashbaugh Kristen, and Koegel Lynn Kern. Improving Question-Asking Initiations in Young Children with Autism Using Pivotal Response Treatment. *Journal of Autism and Developmental Disorders*, 44(4):816–827, 2014.
- [184] Kong Maureen Mo-ye and Au Terry Kit-fong. The Incredible Years Parent Program for Chinese Preschoolers With Developmental Disabilities. *Early Education and Development*, 29(4):494–514, 2018.
- [185] Kourassanis-Velasquez Jennifer and Jones Emily A. Increasing joint attention in children with autism and their peers. *Behavior Analysis in Practice*, 12(1):78–94, 2019.
- [186] Krause F E, Richter K, and Rohifing K J. I or you? - Therapy of pronoun reversal in autism spectrum disorder. *L.O.G.O.S. Interdisziplinair*, 22(1):4–15, 2014.
- [187] Kretzmann Mark, Shih Wendy, and Kasari Connie. Improving peer engagement of children with autism on the school playground: a randomized controlled trial. *Behavior Therapy*, 46(1):20–28, 2015.
- [188] Krishnan R, Nesh M T.J.A, Russell P S.S, Russell S, and Mammen P. The effectiveness of an intensive, parent mediated, multi-component, early intervention for children with autism. *Journal of Indian Association for Child and Adolescent Mental Health*, 12(3):230–252, 2016.
- [189] Krstovska-Guerrero Ivana and Jones Emily A. Social-Communication Intervention for Toddlers with Autism Spectrum Disorder: Eye Gaze in the Context of Requesting and Joint Attention. *Journal of Developmental and Physical Disabilities*, 28(2):289–316, 2016.
- [190] Kryzak Lauren A, Cengher Mirela, Feeley Kathleen M, Fienup Daniel M, and Jones Emily A. A Community Support Program for Children with Autism and Their Typically Developing Siblings: Initial Investigation. *Journal of Intellectual Disabilities*, 19(2):159–177, 2015.
- [191] Lacava Paul G, Rankin Ana, Mahlios Emily, Cook Katie, and Simpson Richard L. A single case design evaluation of a software and tutor intervention addressing emotion recognition and social interaction in four boys with ASD. *Autism*, 14(3):161–178, 2010.
- [192] LaGasse A Blythe. Effects of a Music Therapy Group Intervention on Enhancing Social Skills in Children with Autism. *Journal of Music Therapy*, 51(3):250–275, 2014.
- [193] Landa Rebecca J, Holman Katherine C, O'Neill Allison H, and Stuart Elizabeth A. Intervention targeting development of socially synchronous engagement in toddlers with autism spectrum disorder: a randomized controlled trial. *Journal of Child Psychology and Psychiatry*, 52(1):13–21, 2011.
- [194] Law Gloria C, Neihart Maureen, and Dutt Anuradha. The Use of Behavior Modeling Training in a Mobile App Parent Training Program to Improve Functional Communication of Young Children with Autism Spectrum Disorder. *Autism: The International Journal of Research and Practice*, 22(4):424–439, 2018.
- [195] Lawton Kathy and Kasari Connie. Brief report: Longitudinal improvements in the quality of joint attention in preschool children with autism. *Journal of Autism and Developmental Disorders*, 42(2):307–312, 2012.
- [196] Lawton Kathy and Kasari Connie. Teacher-Implemented Joint Attention Intervention: Pilot Randomized Controlled Study for Preschoolers With Autism. *Journal of Consulting and Clinical Psychology*, 80(4):687–693, 2012.
- [197] Leadbitter K, Aldred C, McConachie H, Le Couteur, A, Kapadia D, Charman T, Macdonald W, Salomone E, Emsley R, Green J, Barrett B, Barron S, Beggs K, Blazey L, Bourne K, Byford S, Cole-Fletcher R, Collino J, Colmer R, Cutress A, Gammer I, Harrop C, Houghton T, Howlin P, Hudry K, Leach S, Maxwell J, Parr J, Pickles A, Randles S, Slonims V, Taylor C, Temple K, Tobin H, Vamvakas G, White L, and The PACT Consortium. The Autism Family Experience Questionnaire (AFEQ): An Ecologically-Valid, Parent-Nominated Measure of Family Experience, Quality of Life and Prioritised Outcomes for Early Intervention. *Journal of Autism and Developmental Disorders*, 48(4):1052–1062, 2018.
- [198] Leaf J B, Leaf J A, Milne C, Taubman M, Oppenheim-Leaf M, Torres N, Townley-Cochran D, Leaf R, McEachin J, Yoder P, and Autism Partnership Foundation. An Evaluation of a Behaviorally Based Social Skills Group for Individuals Diagnosed with Autism Spectrum Disorder. *Journal of Autism and Developmental Disorders*, 47(2):243–259, 2017.

- [199] Leaf Justin B, Taubman Mitchell, Bloomfield Stephanie, Palos-Rafuse Letty, Leaf Ron, McEachin John, and Oppenheim Misty L. Increasing social skills and pro-social behavior for three children diagnosed with autism through the use of a teaching package. *Research in Autism Spectrum Disorders*, 3(1):275–289, 2009.
- [200] Ledford Jennifer R, Lane Justin D, Shepley Collin, and Kroll Sarah M. Using Teacher-Implemented Playground Interventions to Increase Engagement, Social Behaviors, and Physical Activity for Young Children with Autism. *Focus on Autism and Other Developmental Disabilities*, 31(3):163–173, 2016.
- [201] Ledford Jennifer R and Wehby Joseph H. Teaching Children with Autism in Small Groups with Students Who are At-Risk for Academic Problems: Effects on Academic and Social Behaviors. *Journal of Autism and Developmental Disorders*, 45(6):1624–1635, 2015.
- [202] Ledford Jennifer R, Zimmerman Kathleen N, Chazin Kate T, Patel Natasha M, Morales Vivian A, and Bennett Brittany P. Coaching Paraprofessionals to Promote Engagement and Social Interactions during Small Group Activities. *Journal of Behavioral Education*, 26(4):410–432, 2017.
- [203] Li Minjia, Li Xue, Xie Lun, Liu Jing, Wang Feifei, and Wang Zhiliang. Assisted therapeutic system based on reinforcement learning for children with autism. *Computer Assisted Surgery*, 24(2, SI):94–104, 2019.
- [204] Liao S T, Hwang Y S, Chen Y J, Lee P, Chen S J, and Lin L Y. Home-based DIR/Floortime® intervention program for preschool children with autism spectrum disorders: Preliminary findings. *Physical and Occupational Therapy in Pediatrics*, 34(4):356–367, 2014.
- [205] Locke Jill, Kang-Yi Christina, Pellecchia Melanie, and Mandell David S. It's Messy but Real: A Pilot Study of the Implementation of a Social Engagement Intervention for Children with Autism in Schools. *Journal of Research in Special Educational Needs*, 19(2):135–144, 2019.
- [206] Locke Jill, Shih Wendy, Kang-Yi Christina D, Caramanico Julie, Shingledecker Travis, Gibson Jordan, Frederick Lindsay, and Mandell David S. The impact of implementation support on the use of a social engagement intervention for children with autism in public schools. *Autism*, 23(4):834–845, 2019.
- [207] Lopata C, Thomeer M L, Volker M A, Lee G K, Smith T H, Rodgers J D, Smith R A, Gullo G, McDonald C A, Mirwis J, and Toomey J A. Open-Trial Pilot Study of a Comprehensive School-Based Intervention for High-Functioning Autism Spectrum Disorders. *Remedial and Special Education*, 34(5):269–281, 2013.
- [208] Lorenzo Gonzalo, Gomez-Puerta Marcos, Arraez-Vera Graciela, and Lorenzo-Lledo Alejandro. Preliminary study of augmented reality as an instrument for improvement of social skills in children with autism spectrum disorder. *Education and Information Technologies*, 24(1):181–204, 2019.
- [209] Louis P T and Kumar N. Does father involvement influence the affect, language acquisition, social engagement and behavior in young autistic children? An early intervention study. *Journal of Special Education and Rehabilitation*, 16(1-2):105–124, 2015.
- [210] MacDonald Rebecca, Sacramone Shelly, Mansfield Renee, Wiltz Kristine, and Ahearn William H. Using Video Modeling to Teach Reciprocal Pretend Play to Children with Autism. *Journal of Applied Behavior Analysis*, 42(1):43–55, 2009.
- [211] Madzharova Maya S and Sturmey Peter. Effects of Video Modeling and Feedback on Mothers' Implementation of Peer-to-Peer Manding. *Behavioral Interventions*, 30(3):270–285, 2015.
- [212] Mahoney G, Wiggers B, Nam S, Kralovic S, and Perales F. How depressive symptomatology of mothers of children with pervasive developmental disorders relates to their participation in relationship focused intervention. *International Journal of Early Childhood Special Education*, 6(2):204–221, 2014.
- [213] Mahoney Gerald and Solomon Richard. Mechanism of Developmental Change in the PLAY Project Home Consultation Program: Evidence from a Randomized Control Trial. *Journal of Autism and Developmental Disorders*, 46(5):1860–1871, 2016.
- [214] Maich K, Hall C L, van Rhijn, T M, and Squires K. Investigating Stay, Play, & Talk: A peer-mediated social skills intervention for young children with autism spectrum disorder and other social challenges. *Exceptionality Education International*, 28(2):82–104, 2018.
- [215] Mancil G Richmond, Lorah Elizabeth R, and Whitby Peggy Schaefer. Effects of iPod Touch® Technology as Communication Devices on Peer Social Interactions across Environments. *Education and Training in Autism and Developmental Disabilities*, 51(3):252–264, 2016.

- [216] Mandelberg Josh, Frankel Fred, Cunningham Tina, Gorospe Clarissa, and Laugeson Elizabeth A. Long-term outcomes of parent-assisted social skills intervention for high-functioning children with autism spectrum disorders. *Autism*, 18(3):255–263, 2014.
- [217] Manohar Harshini, Kandasamy Preeti, Chandrasekaran Venkatesh, and Rajkumar Ravi Philip. Brief Parent-Mediated Intervention for Children with Autism Spectrum Disorder: A Feasibility Study from South India. *Journal of Autism and Developmental Disorders*, 49(8):3146–3158, 2019.
- [218] Marion Carole, Martin Garry L, Yu C T, and Buhler Charissa. Teaching children with Autism Spectrum Disorder to mand 'What is it?'. *Research in Autism Spectrum Disorders*, 5(4):1584–1597, 2011.
- [219] Marion Carole, Martin Garry L, Yu C T, Buhler Charissa, and Kerr Danni. Teaching children with autism spectrum disorder to mand 'where?'. *Journal of Behavioral Education*, 21(4):273–294, 2012.
- [220] Marzullo-Kerth Denise, Reeve Sharon A, Reeve Kenneth F, and Townsend Dawn B. Using Multiple-Exemplar Training to Teach a Generalized Repertoire of Sharing to Children with Autism. *Journal of Applied Behavior Analysis*, 44(2):279–294, 2011.
- [221] Mason Rose, Kamps Debra, Turcotte Amy, Cox Suzanne, Feldmiller Sarah, and Miller Todd. Peer mediation to increase communication and interaction at recess for students with autism spectrum disorders. *Research in Autism Spectrum Disorders*, 8(3):334–344, 2014.
- [222] Matsuda Soichiro, Nunez Eleuda, Hirokawa Masakazu, Yamamoto Junichi, and Suzuki Kenji. Facilitating Social Play for Children with PDDs: Effects of Paired Robotic Devices. *Frontiers in Psychology*, 8, 2017.
- [223] Matsuzaki Atsuko and Yamamoto Jun-ichi. Effects of an early intervention program on preverbal communication in a child with autism: Developmental and behavioral analysis with a multiple-baseline design. *Japanese Journal of Special Education*, 49(6):657–669, 2012.
- [224] McConkey Roy, MacLeod Sue, Cassidy Arlene, Roy McConkey, Sue MacLeod, and Arlene Cassidy. The Keyhole® Rainbow Resource Kit: meeting the needs of parents of newly diagnosed preschoolers with ASD. *Early Child Development & Care*, 181(3):321–334, 2011.
- [225] McDuffie Andrea, Machalicek Wendy, Oakes Ashley, Haebig Eileen, Weismer Susan Ellis, and Abbeduto Leonard. Distance Video-Teleconferencing in Early Intervention: Pilot Study of a Naturalistic Parent-Implemented Language Intervention. *Topics in Early Childhood Special Education*, 33(3):172–185, 2013.
- [226] McFadden Brandon, Kamps Debra, and Heitzman-Powell Linda. Social communication effects of peer-mediated recess intervention for children with autism. *Research in Autism Spectrum Disorders*, 8(12):1699–1712, 2014.
- [227] McLay Laurie, Sch€fer Martina C. M, van der Meer, Larah, Couper Llyween, McKenzie Emma, O'Reilly Mark F, Lancioni Giulio E, Marschik Peter B, Sigafos Jeff, and Sutherland Dean. Acquisition, preference and follow-up comparison across three AAC modalities taught to two children with autism spectrum disorder. *International Journal of Disability, Development and Education*, 64(2):117–130, 2017.
- [228] Meadan H, Ostrosky M M, Zaghlawan H Y, and Yu S. Using coaching with preschool teachers to support the social skills of children with and without autism spectrum disorders. *International Journal of Early Childhood Special Education*, 4(2):74–94, 2012.
- [229] Mengoni Silvana E, Irvine Karen, Thakur Deepshikha, Barton Garry, Dautenhahn Kerstin, Guldberg Karen, Robins Ben, Wellsted David, and Sharma Shivani. Feasibility study of a randomised controlled trial to investigate the effectiveness of using a humanoid robot to improve the social skills of children with autism spectrum disorder (Kaspar RCT): a study protocol. *BMJ open*, 7(6):e017376, 2017.
- [230] Miltenberger Catherine A and Charlop Marjorie H. Increasing the Athletic Group Play of Children with Autism. *Journal of Autism and Developmental Disorders*, 44(1):41–54, 2014.
- [231] Mitchell Elisabeth Sheridan, Mrug Sylvie, Patterson Cryshelle S, Bailey Kirstin J, and Hodgins J Bart. Summer Treatment Program Improves Behavior of Children with High-Functioning Autism Spectrum Disorder. *Journal of Autism and Developmental Disorders*, 45(8):2295–2310, 2015.
- [232] Mohammadzaheri Fereshteh, Koegel Lynn Kern, Rezaee Mohammad, and Rafiee Seyed Majid. A Randomized Clinical Trial Comparison between Pivotal Response Treatment (PRT) and Structured Applied Behavior Analysis (ABA) Intervention for Children with Autism. *Journal of Autism and Developmental Disorders*, 44(11):2769–2777, 2014.

- [233] Morrier Michael J and Ziegler Sonja M. T. I Wanna Play Too: Factors Related to Changes in Social Behavior for Children with and without Autism Spectrum Disorder after Implementation of a Structured Outdoor Play Curriculum. *Journal of Autism and Developmental Disorders*, 48(7):2530–2541, 2018.
- [234] Muneer R, Saxena T, and Karanth P. Virtual reality games as an intervention for children: A pilot study. *Disability, CBR and Inclusive Development*, 26(3):77–96, 2015.
- [235] Murdock Linda C, Ganz Jennifer, and Crittendon Jessica. Use of an iPad Play Story to Increase Play Dialogue of Preschoolers with Autism Spectrum Disorders. *Journal of Autism and Developmental Disorders*, 43(9):2174–2189, 2013.
- [236] Murdock Linda C and Hobbs Jan Q. Picture Me Playing: Increasing pretend play dialogue of children with autism spectrum disorders. *Journal of Autism and Developmental Disorders*, 41(7):870–878, 2011.
- [237] Muzammal Madiha S and Jones Emily A. Social-Communication Intervention for Toddlers with Autism Spectrum Disorder: Effects on Initiating Joint Attention and Interactions with Mother. *Journal of Developmental and Physical Disabilities*, 29(2):203–221, 2017.
- [238] Müller Eve and Donley Christy. Measuring the impact of a school-based, integrative approach to play therapy on students with autism and their classroom instructors. *International Journal of Play Therapy*, 28(3):123–132, 2019.
- [239] Nair M K. C, Russell Paul Swamidhas Sudhakar, George Babu, Prasanna G L, Bhaskaran Deepa, Leena M L, Russell Sushila, and Mammen Priya. CDC Kerala 9: Effectiveness of Low Intensity Home Based Early Intervention for Autism Spectrum Disorder in India. *Indian Journal of Pediatrics*, 81(2):S115–S119, 2014.
- [240] Nair M K. C, Russell Paul Swamidhas Sudhakar, George Babu, Prasanna G L, Mini A O, Leena M L, Russell Sushila, and Minju K A. CDC Kerala 8: Effectiveness of a clinic based, low intensity, early intervention for children with autism spectrum disorder in India: a naturalistic observational study. *Indian Journal of Pediatrics*, 81 Suppl 2:S110–114, 2014.
- [241] Najafabadi M G, Sheikh M, Hemayattalab R, Memari A H, Aderyani M R, and Hafizi S. The effect of SPARK on social and motor skills of children with autism. *Pediatrics and Neonatology*, 59(5):481–487, 2018.
- [242] Nelson Catherine, Paul Kristen, Johnston Susan S, and Kidder Jaimee E. Use of a creative dance intervention package to increase social engagement and play complexity of young children with autism spectrum disorder. *Education and Training in Autism and Developmental Disabilities*, 52(2):170–185, 2017.
- [243] Ninci Jennifer, Lang Russell, Davenport Katy, Lee Allyson, Garner Jennifer, Moore Melissa, Boutot Amanda, Rispoli Mandy, and Lancioni Giulio. An analysis of the generalization and maintenance of eye contact taught during play. *Developmental Neurorehabilitation*, 16(5):301–307, 2013.
- [244] Nowell Sallie W, Watson Linda R, Boyd Brian, and Klinger Laura G. Efficacy Study of a Social Communication and Self-Regulation Intervention for School-Age Children with Autism Spectrum Disorder: A Randomized Controlled Trial. *Language, Speech, and Hearing Services in Schools*, 50(3):416–433, 2019.
- [245] Nunes Débora R. P, Araújo Eliana R, Walter Elizabeth, Soares Rute, & Mendonça Camila. Augmenting Caregiver Responsiveness: An Intervention Proposal for Youngsters with Autism in Brazil. *Early Childhood Education Journal*, 44(1):39–49, 2016.
- [246] O'Connor Chloe and Stagnitti Karen. Play, behaviour, language and social skills: The comparison of a play and a non-play intervention within a specialist school setting. *Research in Developmental Disabilities*, 32(3):1205–1211, 2011.
- [247] Oosterling Iris, Visser Janne, Swinkels Sophie, Rommelse Nanda, Donders Rogier, Woudenberg Tim, Roos Sascha, van der Gaag, Rutger Jan, and Buitelaar Jan. Randomized controlled trial of the focus parent training for toddlers with autism: 1-year outcome. *Journal of Autism and Developmental Disorders*, 40(12):1447–1458, 2010.
- [248] Ostry Cheryl and Wolfe Pamela S. Teaching Children With Autism to Ask "What's That?" Using a Picture Communication With Vocal Results. *Infants & Young Children: An Interdisciplinary Journal of Early Childhood Intervention*, 24(2):174–192, 2011.
- [249] Palechka Gail and MacDonald Rebecca. A comparison of the acquisition of play skills using instructor-created video models and commercially available videos. *Education & Treatment of Children*, 33(3):457–474, 2010.
- [250] Pan Chien-Yu. Effects of Water Exercise Swimming Program on Aquatic Skills and Social Behaviors in Children with Autism Spectrum Disorders. *Autism: The International Journal of Research and Practice*, 14(1):9–28, 2010.



- [251] Papacek Amy M. The Role of Peer Guided Play for Children with Autism Spectrum Disorder. *Journal of the American Academy of Special Education Professionals*, pages 80–97, 2015.
- [252] Parsons Dave, Cordier Reinie, Lee Hoe, Falkmer Torbjorn, and Vaz Sharmila. A Randomised Controlled Trial of an Information Communication Technology Delivered Intervention for Children with Autism Spectrum Disorder Living in Regional Australia. *Journal of Autism and Developmental Disorders*, 49(2):569–581, 2019.
- [253] Parsons Lauren, Cordier Reinie, Munro Natalie, and Joosten Annette. The feasibility and appropriateness of a peer-to-peer, play-based intervention for improving pragmatic language in children with autism spectrum disorder. *INTERNATIONAL JOURNAL OF SPEECH-LANGUAGE PATHOLOGY*, 21(4):412–424, 2019.
- [254] Parsons Lauren, Cordier Reinie, Munro Natalie, and Joosten Annette. A Randomized Controlled Trial of a Play-Based, Peer-Mediated Pragmatic Language Intervention for Children With Autism. *Frontiers in Psychology*, 10, 2019.
- [255] Paul Arkoprovo, Sharda Megha, Menon Soumini, Arora Iiti, Kansal Nayantara, Arora Kavita, and Singh Nan-dini C. The effect of sung speech on socio-communicative responsiveness in children with autism spectrum disorders. *Frontiers in Human Neuroscience*, 9, 2015.
- [256] Paul Rhea, Campbell Daniel, Gilbert Kimberly, and Tsiouri Ioanna. Comparing Spoken Language Treatments for Minimally Verbal Preschoolers with Autism Spectrum Disorders. *Journal of Autism and Developmental Disorders*, 43(2):418–431, 2013.
- [257] Penney Ashley and Schwartz Ilene. Effects of coaching on the fidelity of parent implementation of reciprocal imitation training. *Autism: The International Journal of Research & Practice*, 23(6):1497–1507, 2019.
- [258] Perera Hemamali, Jeewandara Kamal Chandima, Seneviratne Sudarshi, and Guruge Chandima. Outcome of Home-Based Early Intervention for Autism in Sri Lanka: Follow-Up of a Cohort and Comparison with a Nonintervention Group. *Biomed Res Int*, 2016.
- [259] Persicke Angela, St Clair, Megan, Tarbox Jonathan, Najdowski Adel, Ranick Jennifer, Yu Yue, de Nocker, and Yanicka L. Teaching children with autism to attend to socially relevant stimuli. *Research in Autism Spectrum Disorders*, 7(12):1551–1557, 2013.
- [260] Peters Brenda. A model for enhancing social communication and interaction in everyday activities for primary school children with ASD. *Journal of Research in Special Educational Needs*, 16(2):89–101, 2016.
- [261] Pickles A, Le Couteur, A, Leadbitter K, Salomone E, Cole-Fletcher R, Tobin H, Gammer I, Lowry J, Vamvakas G, Byford S, Aldred C, Slonims V, McConachie H, Howlin P, Parr J R, Charman T, and Green J. Parent-mediated social communication therapy for young children with autism (PACT): long-term follow-up of a randomised controlled trial. *The Lancet*, 388(10059):2501–2509, 2016.
- [262] Pop Cristina A, Pinteá Sebastian, Vanderborght Bram, and David Daniel O. Enhancing play skills, engagement and social skills in a play task in ASD children by using robot-based interventions. A pilot study. *Interaction Studies*, 15(2):292–320, 2014.
- [263] Porayska-Pomsta K, Alcorn A M, Avramides K, Beale S, Bernardini S, Foster M E, Frauenberger C, Good J, Guldberg K, Keay-Bright W, Kossyvaki L, Lemon O, Mademtzí M, Menzies R, Pain H, Rajendran G, Waller A, Wass S, and Smith T J. Blending human and artificial intelligence to support autistic children's social communication skills. *ACM Transactions on Computer-Human Interaction*, 25(6), 2018.
- [264] Poslawsky Irina E, Naber Fabiãkne BA, Bakermans-Kranenburg Marian J, van Daalen, Emma, van Engeland, Herman, van IJzendoorn, and Marinus H. Video-Feedback Intervention to Promote Positive Parenting Adapted to Autism (VIPP-AUTI): A Randomized Controlled Trial. *Autism: The International Journal of Research and Practice*, 19(5):588–603, 2015.
- [265] Preis Janet, Amon Roxanne, Robinette Dara Silbert, and Rozegar Ashley. Does music matter? The effects of background music on verbal expression and engagement in children with autism spectrum disorders. *Music Therapy Perspectives*, 34(1):106–115, 2016.
- [266] Prelock Patricia A, Calhoun James, Morris Hope, and Platt Gretchen. Supporting Parents to Facilitate Communication and Joint Attention in Their Young Children with Autism Spectrum Disorders: Two Pilot Studies. *Topics in Language Disorders*, 31(3):210–234, 2011.
- [267] Radley Keith C, Dart Evan H, Helbig Kate A, Schrieber Stefanie R, and Ware Mary E. An evaluation of the additive effects of lag schedules of reinforcement. *Developmental Neurorehabilitation*, 22(3):180–191, 2019.

- [268] Radley Keith C, Dart Evan H, Moore James W, Lum John D. K, and Pasqua Jamie. Enhancing appropriate and variable responding in young children with autism spectrum disorder. *Developmental Neurorehabilitation*, 20(8):538–548, 2017.
- [269] Radley Keith C, Hanglein Jeanine, and Arak Marisa. School-based social skills training for preschool-age children with autism spectrum disorder. *Autism*, 20(8):938–951, 2016.
- [270] Radley Keith C, Jenson William R, Clark Elaine, Hood Julia A, and Nicholas Peter. Using a Multimedia Social Skills Intervention to Increase Social Engagement of Young Children with Autism Spectrum Disorder. *Intervention in School and Clinic*, 50(1):22–28, 2014.
- [271] Radley Keith C, Jenson William R, Clark Elaine, and O'Neill Robert E. The feasibility and effects of a parent-facilitated social skills training program on social engagement of children with autism spectrum disorders. *Psychology in the Schools*, 51(3):241–255, 2014.
- [272] Radley Keith C, O'Handley Roderick D, Battaglia Allison A, Lum John D. K, Dadakhodjaeva Komila, Ford William B, and McHugh Melissa B. Effects of a Social Skills Intervention on Children with Autism Spectrum Disorder and Peers with Shared Deficits. *Education and Treatment of Children*, 40(2):233–262, 2017.
- [273] Randolph Jena K, Stichter Janine P, Schmidt Carla T, and O'Connor Karen V. Fidelity and Effectiveness of PRT Implemented by Caregivers without College Degrees. *Focus on Autism and Other Developmental Disabilities*, 26(4):230–238, 2011.
- [274] Rao V S and Ashok M V. Joint attention routines in intervention for children with autism spectrum disorders. *Journal of Indian Association for Child and Adolescent Mental Health*, 10(4):292–298, 2014.
- [275] Reagon Kara A and Higbee Thomas S. Parent-Implemented Script Fading to Promote Play-Based Verbal Initiations in Children with Autism. *Journal of Applied Behavior Analysis*, 42(3):659–664, 2009.
- [276] Reis Helena I. S, Pereira Ana P.S, and Almeida Leandro S. Intervention effects on communication skills and sensory regulation on children with ASD. *Journal of Occupational Therapy Schools and Early Intervention*, 11(3):346–359, 2018.
- [277] Reitzel J, Summers J, Lorv B, Szatmari P, Zwaigenbaum L, Georgiades S, and Duku E. Pilot randomized controlled trial of a Functional Behavior Skills Training program for young children with Autism Spectrum Disorder who have significant early learning skill impairments and their families. *Research in Autism Spectrum Disorders*, 7(11):1418–1432, 2013.
- [278] Rieth Sarah R, Stahmer Aubyn C, Suhrheinrich Jessica, Schreibman Laura, Kennedy Joanna, and Ross Benjamin. Identifying Critical Elements of Treatment: Examining the Use of Turn Taking in Autism Intervention. *Focus on Autism and Other Developmental Disabilities*, 29(3):168–179, 2014.
- [279] Roberts Jacqueline, Williams Katrina, Carter Mark, Evans David, Parmenter Trevor, Silove Natalie, Clark Trevor, and Warren Anthony. A randomised controlled trial of two early intervention programs for young children with autism: Centre-based with parent program and home-based. *Research in Autism Spectrum Disorders*, 5(4):1553–1566, 2011.
- [280] Rogers S J, Estes A, Vismara L, Munson J, Zierhut C, Greenson J, Dawson G, Rocha M, Sugar C, Senturk D, Whelan F, and Talbott M. Enhancing Low-Intensity Coaching in Parent Implemented Early Start Denver Model Intervention for Early Autism: A Randomized Comparison Treatment Trial. *Journal of Autism and Developmental Disorders*, 49(2):632–646, 2019.
- [281] Rollins Pamela Rosenthal. Words Are Not Enough: Providing the Context for Social Communication and Interaction. *Topics in Language Disorders*, 36(3):198–216, 2016.
- [282] Rollins Pamela Rosenthal. Setting the stage: Creating a social pragmatic environment for toddlers with ASD and their caregivers. *Revista de Logopedia, Foniatrã y Audiologã*, 38(1):14–23, 2018.
- [283] Rollins Pamela Rosenthal, Campbell Michelle, Hoffman Renee Thibodeau, and Self Kayli. A community-based early intervention program for toddlers with autism spectrum disorders. *Autism: The International Journal of Research and Practice*, 20(2):219–232, 2016.
- [284] Salter Kerri, Beamish Wendi, and Davies Mike. The effects of child-centered play therapy (CCPT) on the social and emotional growth of young Australian children with autism. *International Journal of Play Therapy*, 25(2):78–90, 2016.
- [285] Samadi Sayyed Ali and Mahmoodizadeh Ameneh. Omid Early Intervention Resource Kit for Children with Autism Spectrum Disorders and Their Families. *Early Child Development and Care*, 184(3):354–369, 2014.

- [286] Sanefuji Wakako and Ohgami Hidehiro. "Being-Imitated" Strategy at Home-Based Intervention for Young Children with Autism. *Infant Mental Health Journal*, 34(1):72–79, 2013.
- [287] Scagnelli Melissa, Copelli Cristina, Presti Giovambattista, and Moderato Paolo. Does a treatment for increasing social skill affect the occurrence of challenging behaviors? *Life Span and Disability*, 20(2):163–181, 2017.
- [288] Scassellati Brian, Boccanfuso Laura, Huang Chien-Ming, Mademtzi Marilena, Qin Meiyang, Salomons Nicole, Ventola Pamela, and Shic Frederick. Improving social skills in children with ASD using a long-term, in-home social robot. *Science Robotics*, 3(21), 2018.
- [289] Schefflen Sarah Clifford, Freeman Stephanny F.N, and Paparella Tanya. Using Video Modeling to Teach Young Children with Autism Developmentally Appropriate Play and Connected Speech. *Education and Training in Autism and Developmental Disabilities*, 47(3):302–318, 2012.
- [290] Schertz Hannah H, Odom Samuel L, Baggett Kathleen M, and Sideris John H. Effects of Joint Attention Mediated Learning for toddlers with autism spectrum disorders: An initial randomized controlled study. *Early Childhood Research Quarterly*, 28(2):249–258, 2013.
- [291] Schertz Hannah H, Odom Samuel L, Baggett Kathleen M, and Sideris John H. Mediating Parent Learning to Promote Social Communication for Toddlers with Autism: Effects from a Randomized Controlled Trial. *Journal of Autism and Developmental Disorders*, 48(3):853–867, 2018.
- [292] Schmidt Carla, Schmidt Matthew, Kamps Debra, Thiemann-Bourque Kathy, and Mason Rose. Pilot investigation of language development of children with autism receiving peer networks intervention. *Journal on Developmental Disabilities*, 23(1):3–17, 2017.
- [293] Schrandt Jessica A, Townsend Dawn Buffington, and Poulson Claire L. Teaching empathy skills to children with autism. *Journal of Applied Behavior Analysis*, 42(1):17–32, 2009.
- [294] Schreibman L, Stahmer A C, Barlett V C, and Dufek S. Brief report: Toward refinement of a predictive behavioral profile for treatment outcome in children with autism. *Research in Autism Spectrum Disorders*, 3(1):163–172, 2009.
- [295] Schreibman Laura and Stahmer Aubyn C. A Randomized Trial Comparison of the Effects of Verbal and Pictorial Naturalistic Communication Strategies on Spoken Language for Young Children with Autism. *J Autism Dev Disord*, 44(5):1244–1251, 2014.
- [296] Serret Sylvie, Hun Stephanie, Iakimova Galina, Lozada Jose, Anastassova Margarita, Santos Andreia, Vesperini Stephanie, and Askenazy Florence. Facing the challenge of teaching emotions to individuals with low- and high-functioning autism using a new Serious game: a pilot study. *Molecular Autism*, 5, 2014.
- [297] Shefer S, Leon Attia, O, Rosenan R, Wald O A, Ende H, and Gabis L V. Benefits of medical clowning in the treatment of young children with autism spectrum disorder. *European Journal of Pediatrics*, 178(8):1283–1289, 2019.
- [298] Shih Wendy, Dean Michelle, Kretzmann Mark, Locke Jill, Senturk Damla, Mandell David S, Smith Tristram, and Kasari Connie. Remaking Recess Intervention for Improving Peer Interactions at School for Children with Autism Spectrum Disorder: Multisite Randomized Trial. *School Psychology Review*, 48(2):133–144, 2019.
- [299] Shire Stephanie Y, Chang Ya-Chih, Shih Wendy, Bracaglia Suzanne, Kodjoe Maria, and Kasari Connie. Hybrid implementation model of community-partnered early intervention for toddlers with autism: a randomized trial. *Journal of Child Psychology and Psychiatry, and Allied Disciplines*, 58(5):612–622, 2017.
- [300] Shire Stephanie Y, Goods Kelly, Shih Wendy, Distefano Charlotte, Kaiser Ann, Wright Courtney, Mathy Pamela, Landa Rebecca, and Kasari Connie. Parents' Adoption of Social Communication Intervention Strategies: Families Including Children with Autism Spectrum Disorder Who are Minimally Verbal. *Journal of Autism and Developmental Disorders*, 45(6):1712–1724, 2015.
- [301] Shire Stephanie Y, Gulsrud Amanda, and Kasari Connie. Increasing Responsive Parent-Child Interactions and Joint Engagement: Comparing the Influence of Parent-Mediated Intervention and Parent Psychoeducation. *Journal of Autism and Developmental Disorders*, 46(5):1737–1747, 2016.
- [302] Shire Stephanie Y, Shih Wendy, Chang Ya-Chih, Bracaglia Suzanne, Kodjoe Maria, and Kasari Connie. Sustained Community Implementation of JASPER Intervention with Toddlers with Autism. *Journal of Autism and Developmental Disorders*, 49(5):1863–1875, 2019.

- [303] Shire Stephanie Y, Shih Wendy, and Kasari Connie. Brief Report: Caregiver Strategy Implementation-Advancing Spoken Communication in Children Who are Minimally Verbal. *Journal of Autism and Developmental Disorders*, 48(4):1228–1234, 2018.
- [304] Shireman Molly L, Lerman Dorothea C, and Hillman Conrad B. Teaching Social Play Skills to Adults and Children with Autism as an Approach to Building Rapport. *Journal of Applied Behavior Analysis*, 49(3):512–531, 2016.
- [305] Sigafos Jeff, Lancioni Giulio E, O'Reilly Mark F, Achmadi Donna, Stevens Michelle, Roche Laura, Kagohara Debora M, van der Meer, Larah, Sutherland Dean, Lang Russell, Marschik Peter B, McLay Laurie, Hodis Flaviu, and Green Vanessa A. Teaching two boys with autism spectrum disorders to request the continuation of toy play using an iPad-based speech-generating device. *Research in Autism Spectrum Disorders*, 7(8):923–930, 2013.
- [306] Siller Michael, Hutman Ted, and Sigman Marian. A parent-mediated intervention to increase responsive parental behaviors and child communication in children with ASD: A randomized clinical trial. *Journal of Autism and Developmental Disorders*, 43(3):540–555, 2013.
- [307] Sivaraman Maithri and Fahmie Tara A. Using common interests to increase socialization between children with autism and their peers. *Research in Autism Spectrum Disorders*, 51:1–8, 2018.
- [308] Smith I M, Flanagan H E, Ungar W J, D'Entremont B, Garon N, den Otter, J, Waddell C, Bryson S E, Tsiplova K, Léger N, Vezina F, and Murray P. Comparing the 1-year impact of preschool autism intervention programs in two Canadian provinces. *Autism Research*, 12(4):667–681, 2019.
- [309] Smith Isabel M, Flanagan Helen E, Garon Nancy, and Bryson Susan E. Effectiveness of Community-Based Early Intervention Based on Pivotal Response Treatment. *Journal of Autism and Developmental Disorders*, 45(6):1858–1872, 2015.
- [310] Smith Isabel M, Koegel Robert L, Koegel Lynn K, Openden Daniel A, Fossum Kristin L, and Bryson Susan E. Effectiveness of a novel community-based early intervention model for children with autistic spectrum disorder. *American Journal on Intellectual and Developmental Disabilities*, 115(6):504–523, 2010.
- [311] So W C, Cheng C H, Lam W Y, Wong T, Law W W, Huang Y, Ng K C, Tung H C, and Wong W. Robot-based play-drama intervention may improve the narrative abilities of Chinese-speaking preschoolers with autism spectrum disorder. *Research in Developmental Disabilities*, 95, 2019.
- [312] Solomon Richard, Van Egeren, Laurie A, Mahoney Gerald, Huber Melissa S. Quon, and Zimmerman Perri. PLAY Project Home Consultation Intervention Program for Young Children With Autism Spectrum Disorders: A Randomized Controlled Trial. *Journal of Developmental and Behavioral Pediatrics*, 35(8):475–485, 2014.
- [313] Stadnick Nicole A, Stahmer Aubyn, and Brookman-Frazee Lauren. Preliminary effectiveness of ProjectIMPACT: A parent-mediated intervention for children with autism spectrum disorder delivered in a community program. *Journal of Autism and Developmental Disorders*, 45(7):2092–2104, 2015.
- [314] Stagnitti Karen, O'Connor Chloe, and Sheppard Loretta. Impact of the Learn to Play program on play, social competence and language for children aged 5-8 years who attend a specialist school. *Australian Occupational Therapy Journal*, 59(4):302–311, 2012.
- [315] Stavrou K, Tsimaras V, Alevriadou A, and Gregoriadis A. The effect of an exercise program on communication and behavior of a child with Autism Spectrum Disorder. *Pedagogics Psychology Medical-biological Problems of Physical Training and Sports*, 22(2):99–106, 2018.
- [316] Stock Richard, Mirenda Pat, and Smith Isabel M. Comparison of community-based verbal behavior and pivotal response treatment programs for young children with autism spectrum disorder. *Research in Autism Spectrum Disorders*, 7(9):1168–1181, 2013.
- [317] Strauss Kristin, Esposito Marco, Polidori Giorgia, Vicari Stefano, Valeri Giovanni, and Fava Leonardo. Facilitating play, peer engagement and social functioning in a peer group of young autistic children: Comparing highly structured and more flexible behavioral approaches. *Research in Autism Spectrum Disorders*, 8(4):413–423, 2014.
- [318] Strauss Kristin, Vicari Stefano, Valeri Giovanni, D'Elia Lidia, Arima Serena, and Fava Leonardo. Parent inclusion in Early Intensive Behavioral Intervention: the influence of parental stress, parent treatment fidelity and parent-mediated generalization of behavior targets on child outcomes. *Research in Developmental Disabilities*, 33(2):688–703, 2012.

- [319] Szumski Grzegorz, Smogorzewska Joanna, Grygiel Paweł, and Orlando Ann-Marie. Examining the effectiveness of naturalistic social skills training in developing social skills and theory of mind in preschoolers with ASD. *Journal of Autism and Developmental Disorders*, 49(7):2822–2837, 2019.
- [320] Szumski Grzegorz, Smogorzewska Joanna, and Karwowski Maciej. Can play develop social skills? the effects of play time/social time programme implementation. *International Journal of Developmental Disabilities*, 62(1):41–50, 2016.
- [321] Taheri A, Meghdari A, Alemi M, and Pouretamad H R. Clinical interventions of social humanoid robots in the treatment of a pair of high- and low-functioning autistic Iranian twins. *Scientia Iranica*, 25(3B):1197–1214, 2018.
- [322] Taheri A, Meghdari A, Alemi M, and Pouretamad H R. Teaching music to children with autism: A social robotics challenge. *Scientia Iranica*, 26(1):40–58, 2019.
- [323] Taheri Alireza, Meghdari Ali, Alemi Minoo, and Pouretamad Hamidreza. Human-Robot Interaction in Autism Treatment: A Case Study on Three Pairs of Autistic Children as Twins, Siblings, and Classmates. *International Journal of Social Robotics*, 10(1):93–113, 2018.
- [324] Tan X Y, Trembath D, Bloomberg K, Iacono T, and Caithness T. Acquisition and generalization of key word signing by three children with autism. *Developmental Neurorehabilitation*, 17(2):125–136, 2014.
- [325] Thiemann-Bourque Kathy, Brady Nancy, McGuff Sara, Stump Keenan, and Naylor Amy. Picture exchange communication system and pals: A peer-mediated augmentative and alternative communication intervention for minimally verbal preschoolers with autism. *Journal of Speech, Language, and Hearing Research*, 59(5):1133–1145, 2016.
- [326] Thiemann-Bourque Kathy, Feldmiller Sarah, Hoffman Lesa, and Johner Stacy. Incorporating a Peer-Mediated Approach Into Speech-Generating Device Intervention: Effects on Communication of Preschoolers With Autism Spectrum Disorder. *Journal of Speech Language and Hearing Research*, 61(8), 2018.
- [327] Thiemann-Bourque Kathy S, McGuff Sara, and Goldstein Howard. Training Peer Partners to Use a Speech-Generating Device with Classmates with Autism Spectrum Disorder: Exploring Communication Outcomes across Preschool Contexts. *Journal of Speech, Language, and Hearing Research*, 60(9):2648–2662, 2017.
- [328] Thomeer Marcus L, Rodgers Jonathan D, Lopata Christopher, McDonald Christin A, Volker Martin A, Toomey Jennifer A, Smith Rachael A, and Gullo Gaetano. Open-trial pilot of Mind Reading and in vivo rehearsal for children with HFASD. *Focus on Autism and Other Developmental Disabilities*, 26(3):153–161, 2011.
- [329] Thomeer Marcus L, Smith Rachael A, Lopata Christopher, Volker Martin A, Lipinski Alanna M, Rodgers Jonathan D, McDonald Christin A, and Lee Gloria K. Randomized Controlled Trial of Mind Reading and In Vivo Rehearsal for High-Functioning Children with ASD. *Journal of Autism and Developmental Disorders*, 45(7):2115–2127, 2015.
- [330] Thompson G A, McFerran K S, and Gold C. Family-centred music therapy to promote social engagement in young children with severe autism spectrum disorder: a randomized controlled study. *Child: Care, Health and Development*, 40(6):840–852, 2014.
- [331] Tilmont Pittala, Elodie, Saint-Georges-Chaumet Yann, Favrot Claire, Tanet Antoine, Cohen David, and Saint-Georges Catherine. Clinical outcomes of interactive, intensive and individual (3i) play therapy for children with ASD: a two-year follow-up study. *BMC pediatrics*, 18(1):165, 2018.
- [332] Toret Gokhan and Ozmen Emine Ruya. Effects of Reciprocal Imitation Training on Social Communication Skills of Young Children with Autism Spectrum Disorder. *Egitim Ve Bilim-education and Science*, 44(199):279–296, 2019.
- [333] Touzet Sandrine, Occelli Pauline, Schroeder Carmen, Manificat Sabine, Gicquel Ludovic, Stanciu Razvana, Schaefer Marie, Oreve Marie-Joelle, Speranza Mario, Denis Angelique, Zelmar Amelie, Falissard Bruno, Georgieff Nicolas, Bahrami Stephane, and Geoffroy Marie-Maude. Impact of the Early Start Denver Model on the cognitive level of children with autism spectrum disorder: study protocol for a randomised controlled trial using a two-stage Zelen design. *BMJ OPEN*, 7(3), 2017.
- [334] Travers Jason C and Fefer Sarah A. Effects of shared active surface technology on the communication and speech of two preschool children with disabilities. *Focus on Autism and Other Developmental Disabilities*, 32(1):44–54, 2017.
- [335] Trembath David, Balandin Susan, Togher Leanne, and Stancliffe Roger J. Peer-mediated teaching and augmentative and alternative communication for preschool-aged children with autism. *Journal of Intellectual & Developmental Disability*, 34(2):173–186, 2009.

- [336] Tseng K C, Tseng S H, and Cheng H Y.K. Design, development, and clinical validation of therapeutic toys for autistic children. *Journal of Physical Therapy Science*, 28(7):1972–1980, 2016.
- [337] Turner-Brown Lauren, Hume Kara, Boyd Brian A, and Kainz Kirsten. Preliminary Efficacy of Family Implemented TEACCH for Toddlers: Effects on Parents and Their Toddlers with Autism Spectrum Disorder. *Journal of Autism and Developmental Disorders*, 49(7):2685–2698, 2019.
- [338] Tzanakaki Pagona, Grindle Corinna F, Dungait Sarah, Hulson-Jones Amy, Saville Maria, Hughes J Carl, and Hastings Richard P. Use of a tactile prompt to increase social initiations in children with autism. *Research in Autism Spectrum Disorders*, 8(6):726–736, 2014.
- [339] Vaiouli Potheini, Grimmett Kharon, and Ruich Lawrence J. “Bill is now singing”: Joint engagement and the emergence of social communication of three young children with autism. *Autism*, 19(1):73–83, 2015.
- [340] van Rhijn, T, Osborne C, Ranby S, Maich K, Hall C, Rzepecki L, and Hemmerich A. Peer Play in Inclusive Child Care Settings: Assessing the Impact of Stay, Play, & Talk, a Peer-Mediated Social Skills Program. *Child Care in Practice*, 2019.
- [341] van Straten, Caroline L, Smeekens Iris, Barakova Emilia, Glennon Jeffrey, Buitelaar Jan, and Chen Aojun. Effects of robots' intonation and bodily appearance on robot-mediated communicative treatment outcomes for children with autism spectrum disorder. *Personal and Ubiquitous Computing*, 22(2):379–390, 2018.
- [342] Varanda Cristina de Andrade, Miranda Fernandes, and Fernanda Dreux. Cognitive flexibility training intervention among children with autism: a longitudinal study. *Psicologia-reflexao E Critica*, 30, 2017.
- [343] Varley Danielle, Wright Barry, Cooper Cindy, Marshall David, Biggs Katie, Ali Shehzad, Chater Tim, Coates Elizabeth, Gilbody Simon, de la Cuesta, Gina Gomez, Kingsley Ellen, Le Couteur, Ann, McKelvey Anne, Shephard Neil, and Teare Dawn. Investigating Social Competence and Isolation in children with Autism taking part in LEGO-based therapy clubs In School Environments (I-SOCIALISE): study protocol. *BMJ OPEN*, 9(5), 2019.
- [344] Venker Courtney E, McDuffie Andrea, Weismer Susan Ellis, and Abbeduto Leonard. Increasing verbal responsiveness in parents of children with autism: A pilot study. *Autism*, 16(6):568–585, 2012.
- [345] Ventola Pamela, Friedman Hannah, and Oosting Devon. Pivotal Response Treatment: Case Reports. *The Psychoanalytic Study of the Child*, 69:242–260, 2015.
- [346] Ventola Pamela, Friedman Hannah E, Anderson Laura C, Wolf Julie M, Oosting Devon, Foss-Feig Jennifer, McDonald Nicole, Volkmar Fred, and Pelphrey Kevin A. Improvements in Social and Adaptive Functioning Following Short-Duration PRT Program: A Clinical Replication. *Journal of Autism and Developmental Disorders*, 44(11, SI):2862–2870, 2014.
- [347] Vernon Ty W, Holden Anahita N, Barrett Amy C, Bradshaw Jessica, Ko Jordan A, McGarry Elizabeth S, Horowitz Erin J, Tagavi Daina M, and German Tamsin C. A pilot randomized clinical trial of an enhanced pivotal response treatment approach for young children with autism: The PRISM model. *Journal of Autism and Developmental Disorders*, 49(6):2358–2373, 2019.
- [348] Vernon Ty W, Koegel Robert L, Dauterman Hayley, and Stolen Kathryn. An Early Social Engagement Intervention for Young Children with Autism and Their Parents. *Journal of Autism and Developmental Disorders*, 42(12):2702–2717, 2012.
- [349] Vincent Lori B, Openden Daniel, Gentry Joseph A, Long Lori A, and Matthews Nicole L. Promoting social learning at recess for children with ASD and related social challenges. *Behavior Analysis in Practice*, 11(1):19–33, 2018.
- [350] Vinen Zoe, Clark Megan, Paynter Jessica, and Dissanayake Cheryl. School Age Outcomes of Children with Autism Spectrum Disorder Who Received Community-Based Early Interventions. *Journal of Autism and Developmental Disorders*, 48(5):1673–1683, 2018.
- [351] Vismara Laurie A, Colombi Costanza, and Rogers Sally J. Can one hour per week of therapy lead to lasting changes in young children with autism? *Autism: The International Journal of Research and Practice*, 13(1):93–115, 2009.
- [352] Vismara Laurie A, McCormick Carolyn, Young Gregory S, Nadhan Anna, and Monlux Katerina. Preliminary Findings of a Telehealth Approach to Parent Training in Autism. *Journal of autism and developmental disorders*, 43(12):2953–2969, 2013.

- [353] Vismara Laurie A, Young Gregory S, Stahmer Aubyn C, Griffith Elizabeth McMahon, and Rogers Sally J. Dissemination of Evidence-Based Practice: Can We Train Therapists from a Distance? *Journal of Autism and Developmental Disorders*, 39(12):1636–1651, 2009.
- [354] Vivanti G, Dissanayake C, Duncan E, Feary J, Capes K, Upson S, Bent C A, Rogers S J, Hudry K, Jones C, Bajwa H, Marshall A, Maya J, Pye K, Reynolds J, Rodset D, Toscano G, and the Victorian ASELCC Team. Outcomes of children receiving Group-Early Start Denver Model in an inclusive versus autism-specific setting: A pilot randomized controlled trial. *Autism*, 23(5):1165–1175, 2019.
- [355] Vivanti Giacomo, Dissanayake Cheryl, and Victorian ASELCC Team. Outcome for Children Receiving the Early Start Denver Model Before and After 48 Months. *Journal of Autism and Developmental Disorders*, 46(7):2441–2449, 2016.
- [356] Vivanti Giacomo, Dissanayake Cheryl, Zierhut Cynthia, Rogers Sally J, and Team Victorian ASELCC. Brief Report: Predictors of Outcomes in the Early Start Denver Model Delivered in a Group Setting. *Journal of Autism and Developmental Disorders*, 43(7):1717–1724, 2013.
- [357] Vivanti Giacomo, Paynter Jessica, Duncan Ed, Fothergill Hannah, Dissanayake Cheryl, Rogers Sally J, and Victorian ASELCC Team. Effectiveness and feasibility of the early start denver model implemented in a group-based community childcare setting. *Journal of Autism and Developmental Disorders*, 44(12):3140–3153, 2014.
- [358] Waddington H, van der Meer, L, and Sigafos J. Supporting parents in the use of the early start Denver model as an intervention program for their young children with autism spectrum disorder. *International Journal of Developmental Disabilities*, 2019.
- [359] Waddington H, van der Meer, L, Sigafos J, and Ogilvie E. Evaluation of a low-intensity version of the early start Denver model with four preschool-aged boys with autism spectrum disorder. *International Journal of Developmental Disabilities*, 2019.
- [360] Wainer Allison L and Ingersoll Brooke R. Disseminating ASD Interventions: A Pilot Study of a Distance Learning Program for Parents and Professionals. *Journal of Autism and Developmental Disorders*, 43(1):11–24, 2013.
- [361] Wainer Allison L and Ingersoll Brooke R. Increasing Access to an ASD Imitation Intervention Via a Telehealth Parent Training Program. *Journal of autism and developmental disorders*, 45(12, SI):3877–3890, 2015.
- [362] Wainer Joshua, Dautenhahn Kerstin, Robins Ben, and Amirabdollahian Farshid. A pilot study with a novel setup for collaborative play of the humanoid robot KASPAR with children with autism. *International Journal of Social Robotics*, 6(1):45–65, 2014.
- [363] Walberg Jennifer Loncola and Craig-Unkefer Lesley A. An Examination of the Effects of a Social Communication Intervention on the Play Behaviors of Children with Autism Spectrum Disorder. *Education and Training in Autism and Developmental Disabilities*, 45(1):69–80, 2010.
- [364] Waligórska A, Pisula E, Waligórski M, & Letachowicz M. AutismPro system in supporting treatment of children with autism in Poland. *Pediatrics International*, 54(5): 693–700, 2012.
- [365] Walker Anne Nehlig, Barry Tammy D, and Bader Stephanie H. Therapist and Parent Ratings of Changes in Adaptive Social Skills Following a Summer Treatment Camp for Children with Autism Spectrum Disorders: A Preliminary Study. *Child & Youth Care Forum*, 39(5):305–322, 2010.
- [366] Walton Katherine M and Ingersoll Brooke R. Evaluation of a Sibling-Mediated Imitation Intervention for Young Children with Autism. *Journal of Positive Behavior Interventions*, 14(4):241–253, 2012.
- [367] Warreyn Petra and Roeyers Herbert. See What I See, Do as I Do: Promoting Joint Attention and Imitation in Preschoolers with Autism Spectrum Disorder. *Autism: The International Journal of Research and Practice*, 18(6):658–671, 2014.
- [368] Watkins Laci, O'Reilly Mark, Kuhn Michelle, and Ledbetter-Cho Katherine. An Interest-Based Intervention Package to Increase Peer Social Interaction in Young Children with Autism Spectrum Disorder. *Journal of Applied Behavior Analysis*, 52(1):132–149, 2019.
- [369] Weisblatt E J, Langensiepen C S, Cook B, Dias C, Plaisted Grant, K, Dhariwal M, Fairclough M S, Friend S E, Malone A E, Varga-Elmiyeh B, Rybicki A, Karanth P, and Belmonte M K. A Tablet Computer-Assisted Motor and Language Skills Training Program to Promote Communication Development in Children with Autism: Development and Pilot Study. *International Journal of Human-Computer Interaction*, 35(8):643–665, 2019.

- [370] Whalen Christina, Moss Debbie, Ilan Aaron B, Vaupel Many, Fielding Paul, Macdonald Kevin, Cernich Shannon, and Symon Jennifer. Efficacy of TeachTown: Basics computer-assisted intervention for the Intensive Comprehensive Autism Program in Los Angeles Unified School District. *Autism: The International Journal of Research and Practice*, 14(3):179–197, 2010.
- [371] Whitehouse Andrew J. O, Granich Joanna, Alvares Gail, Busacca Margherita, Cooper Matthew N, Dass Alena, Duong Thi, Harper Rajes, Marshall Wendy, Richdale Amanda, Rodwell Tania, Trembath David, Vellanki Pratibha, Moore Dennis W, and Anderson Angelika. A randomised controlled trial of an iPad-based application to complement early behavioural intervention in Autism Spectrum Disorder. *Journal of Child Psychology and Psychiatry, and Allied Disciplines*, 58(9):1042–1052, 2017.
- [372] Wichnick-Gillis Alison M, Vener Susan M, and Poulson Claire L. The effect of a script-fading procedure on social interactions among young children with autism. *Research in Autism Spectrum Disorders*, 26:1–9, 2016.
- [373] Williams Margiad Elen, Hastings Richard, Charles Joanna Mary, Evans Sue, and Hutchings Judy. Parenting for Autism, Language, And Communication Evaluation Study (PALACES): protocol for a pilot randomised controlled trial. *BMJ OPEN*, 7(2), 2017.
- [374] Wojciechowski Adam and Al-Musawi Raed. Assisitive technology application for enhancing social and language skills of young children with autism. *Multimedia Tools and Applications*, 76(4):5419–5439, 2017.
- [375] Wolfberg Pamela, DeWitt Mila, Young Gregory S, and Nguyen Thanh. Integrated play groups: Promoting symbolic play and social engagement with typical peers in children with ASD across settings. *Journal of Autism and Developmental Disorders*, 45(3):830–845, 2015.
- [376] Wong Connie S. A Play and Joint Attention Intervention for Teachers of Young Children with Autism: A Randomized Controlled Pilot Study. *Autism: The International Journal of Research and Practice*, 17(3):340–357, 2013.
- [377] Wong Virginia C. N and Kwan Queenie K. Randomized controlled trial for early intervention for autism: A pilot study of the Autism 1-2-3 project. *Journal of Autism and Developmental Disorders*, 40(6):677–688, 2010.
- [378] Woodard Cooper R and Chung Jin. Feasibility of a play-based intervention set for toddlers with autism. *Research in Developmental Disabilities*, 80:24–34, 2018.
- [379] Y Pang. Lego games help young children with autism develop social skills. *International Journal of Education*, 2(2):e7, 2010.
- [380] Yang Yen-Hsuan. Parents and Young Children with Disabilities: The Effects of a Home-Based Music Therapy Program on Parent-Child Interactions. *Journal of Music Therapy*, 53(1):27–54, 2016.
- [381] Zachor Ditzza A, Vardi Shira, Baron-Eitan Shani, Brodai-Meir Inbal, Ginossar Noa, and Ben-Itzchak Esther. The effectiveness of an outdoor adventure programme for young children with autism spectrum disorder: a controlled study. *Developmental Medicine and Child Neurology*, 59(5):550–556, 2017.
- [382] Zanobini Mirella and Solari Silvano. Effectiveness of the program 'Acqua Mediatrice di Comunicazione' (Water as a Mediator of Communication) on social skills, autistic behaviors and aquatic skills in ASD children. *Journal of Autism and Developmental Disorders*, 49(10):4134–4146, 2019.
- [383] Zawadzka D, Rymarczuk A, and Bugaj R. Evaluation of the effectiveness of Sensory Integration and Sherborne Developmental Movement in improving of psychomotor functioning of autistic children. *Fizjoterapia*, 22(1):3–17, 2014.
- [384] Zhou B, Xu Q, Li H, Zhang Y, Wang Y, Rogers S J, and Xu X. Effects of Parent-Implemented Early Start Denver Model Intervention on Chinese Toddlers with Autism Spectrum Disorder: A Non-Randomized Controlled Trial. *Autism Research*, 11(4):654–666, 2018.
- [385] Zhou Vanessa, Munson Jeffrey A, Greenson Jessica, Hou Yan, Rogers Sally, and Estes Annette M. An exploratory longitudinal study of social and language outcomes in children with autism in bilingual home environments. *Autism*, 23(2):394–404, 2019.
- [386] Zlomke K R and Jeter K. Comparative Effectiveness of Parent-Child Interaction Therapy for Children with and Without Autism Spectrum Disorder. *Journal of Autism and Developmental Disorders*, 2019.
- [387] Zlomke Kimberly R, Jeter Kathryn, and Murphy Jillian. Open-trial pilot of Parent-Child Interaction Therapy for children with Autism Spectrum Disorder. *Child & Family Behavior Therapy*, 39(1):1–18, 2017.
- [388] Āzen Arzu. Effectiveness of Siblings-Delivered iPad Game Activities in Teaching Social Interaction Skills to Children with Autism Spectrum Disorders. *Educational Sciences: Theory and Practice*, 15(5):1287–1303, 2015.
